# Supplementary material for: One-Pot Synthesis of Novel Multisubstituted 1-Alkoxyindoles
Source: PubMed Central journal article supplement (PMC7962848; doi:10.3390/molecules26051466), 2021-03-08
Supplement: molecules-26-01466-s001.pdf [file molecules-26-01466-s001.pdf]

**Supplementary Materials**  
**for**  
**One-pot Synthesis of Novel Multisubstituted 1-**  
**Alkoxyindoles**

Ye Eun Kim, Hyunsung Cho, Yoo Jin Lim, Chorong Kim, and Sang Hyup Lee\*

College of Pharmacy and Innovative Drug Center, Duksung Women's University,

Seoul 01369, Republic of Korea,

\*sanghyup@duksung.ac.kr

|                                                                              |     |
|------------------------------------------------------------------------------|-----|
| <sup>1</sup> H and <sup>13</sup> C NMR spectrum of compound <b>4x</b> -----  | S3  |
| <sup>1</sup> H and <sup>13</sup> C NMR spectrum of compound <b>4y</b> -----  | S4  |
| <sup>1</sup> H and <sup>13</sup> C NMR spectrum of compound <b>2x</b> -----  | S5  |
| <sup>1</sup> H and <sup>13</sup> C NMR spectrum of compound <b>2y</b> -----  | S6  |
| <sup>1</sup> H and <sup>13</sup> C NMR spectrum of compound <b>1xa</b> ----- | S7  |
| <sup>1</sup> H and <sup>13</sup> C NMR spectrum of compound <b>1xb</b> ----- | S8  |
| <sup>1</sup> H and <sup>13</sup> C NMR spectrum of compound <b>1xc</b> ----- | S9  |
| <sup>1</sup> H and <sup>13</sup> C NMR spectrum of compound <b>1xd</b> ----- | S10 |
| <sup>1</sup> H and <sup>13</sup> C NMR spectrum of compound <b>1xe</b> ----- | S11 |
| <sup>1</sup> H and <sup>13</sup> C NMR spectrum of compound <b>1xf</b> ----- | S12 |
| <sup>1</sup> H and <sup>13</sup> C NMR spectrum of compound <b>1xg</b> ----- | S13 |
| <sup>1</sup> H and <sup>13</sup> C NMR spectrum of compound <b>1xh</b> ----- | S14 |
| <sup>1</sup> H and <sup>13</sup> C NMR spectrum of compound <b>1xi</b> ----- | S15 |
| <sup>1</sup> H and <sup>13</sup> C NMR spectrum of compound <b>1xj</b> ----- | S16 |

|                                                                             |     |
|-----------------------------------------------------------------------------|-----|
| $^1\text{H}$ and $^{13}\text{C}$ NMR spectrum of compound <b>1xk</b> -----  | S17 |
| $^1\text{H}$ and $^{13}\text{C}$ NMR spectrum of compound <b>1xl</b> -----  | S18 |
| $^1\text{H}$ and $^{13}\text{C}$ NMR spectrum of compound <b>1xm</b> -----  | S19 |
| $^1\text{H}$ and $^{13}\text{C}$ NMR spectrum of compound <b>1xn</b> -----  | S20 |
| $^1\text{H}$ and $^{13}\text{C}$ NMR spectrum of compound <b>1ya</b> -----  | S21 |
| $^1\text{H}$ and $^{13}\text{C}$ NMR spectrum of compound <b>1yb</b> -----  | S22 |
| $^1\text{H}$ and $^{13}\text{C}$ NMR spectrum of compound <b>1yc</b> -----  | S23 |
| $^1\text{H}$ and $^{13}\text{C}$ NMR spectrum of compound <b>1yg</b> -----  | S24 |
| $^1\text{H}$ and $^{13}\text{C}$ NMR spectrum of compound <b>1yh</b> -----  | S25 |
| $^1\text{H}$ and $^{13}\text{C}$ NMR spectrum of compound <b>1yj</b> -----  | S26 |
| $^1\text{H}$ and $^{13}\text{C}$ NMR spectrum of compound <b>1yl</b> -----  | S27 |
| $^1\text{H}$ and $^{13}\text{C}$ NMR spectrum of compound <b>1ym</b> -----  | S28 |
| $^1\text{H}$ and $^{13}\text{C}$ NMR spectrum of compound <b>11xl</b> ----- | S29 |
| $^1\text{H}$ and $^{13}\text{C}$ NMR spectrum of compound <b>11xm</b> ----- | S30 |

KYE-131-A, 5.9 mg, CDCl<sub>3</sub>

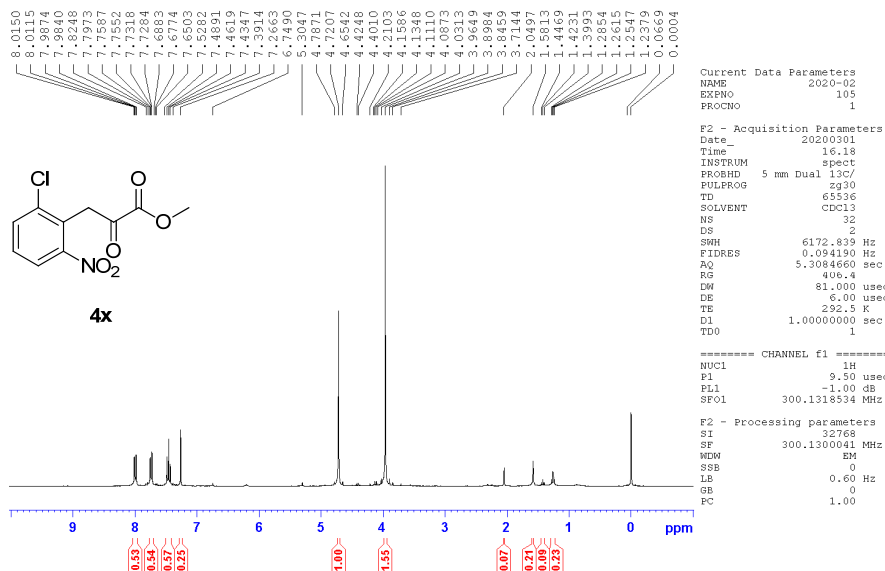

<sup>1</sup>H NMR spectrum (300 MHz, CDCl<sub>3</sub>) of compound 4x

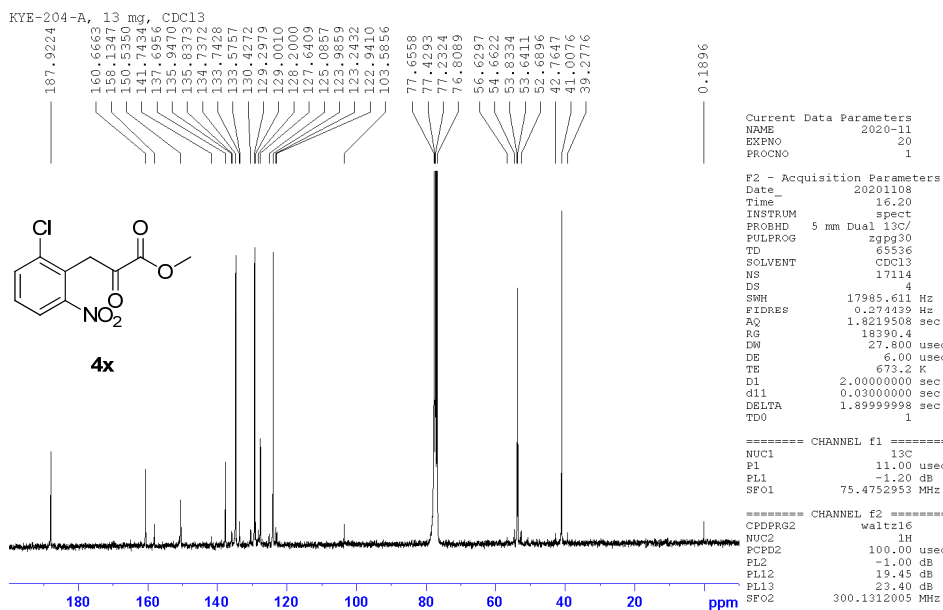

<sup>13</sup>C NMR spectrum (75 MHz, CDCl<sub>3</sub>) of compound 4x

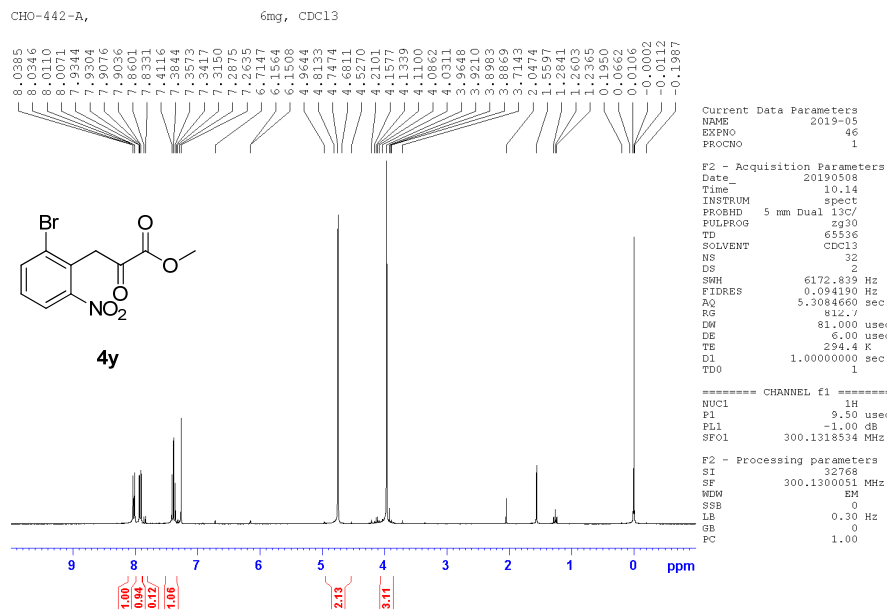

<sup>1</sup>H NMR spectrum (300 MHz, CDCl<sub>3</sub>) of compound 4y

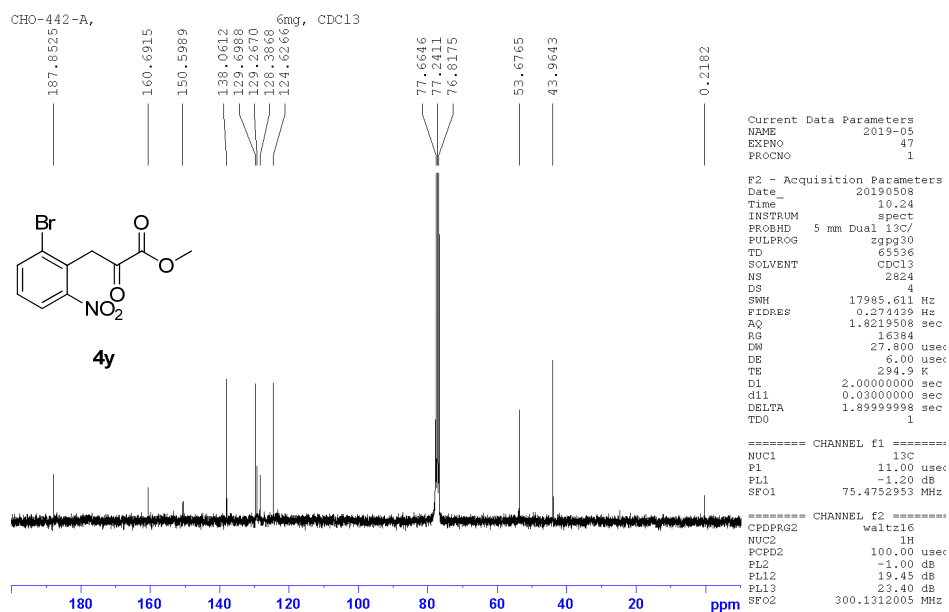

<sup>13</sup>C NMR spectrum (75 MHz, CDCl<sub>3</sub>) of compound 4y

KYE-210-A, 2.7 mg, CDCl<sub>3</sub>

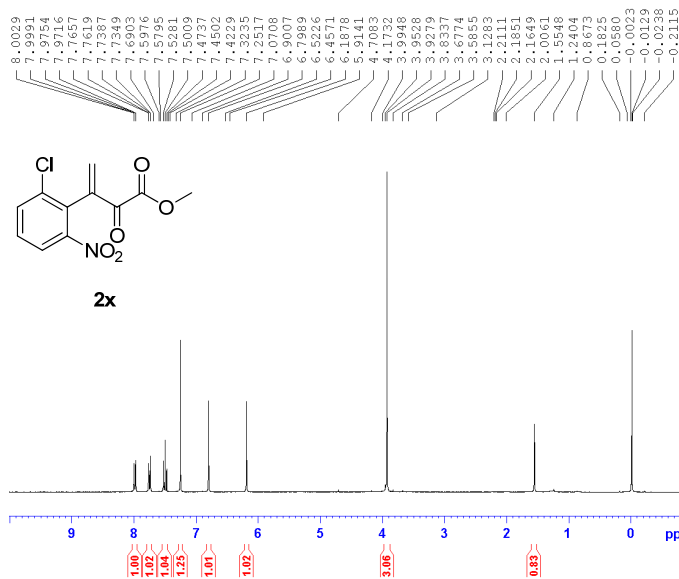

```
Current Data Parameters
NAME      2020-12
EXPNO    98
PROCNO    1

F2 - Acquisition Parameters
Date_     20201224
Time      18.38
INSTRUM   spect
PROBHD    5 mm Dual 13C/
PULPROG   zg30
TD         65536
SOLVENT   cdcl3
NS         32
DS         2
SWH        6172.839 Hz
FIDRES    0.094190 Hz
AQ         5.3084660 sec
RG         312
DM         81.000 usec
DE         6.00 usec
TE         673.2 K
D1         1.00000000 sec
TD0        1

===== CHANNEL f1 =====
NUC1      1H
P1        9.50 usec
PL1       -1.00 dB
SFO1      300.1318534 MHz

F2 - Processing parameters
SI         32768
SF         300.1300085 MHz
WDW        EM
SSB        0
LB         0.60 Hz
GB         0
PC         1.00
```

<sup>1</sup>H NMR spectrum (300 MHz, CDCl<sub>3</sub>) of compound 2x

KYE-154-A, 15 mg, CDCl<sub>3</sub>

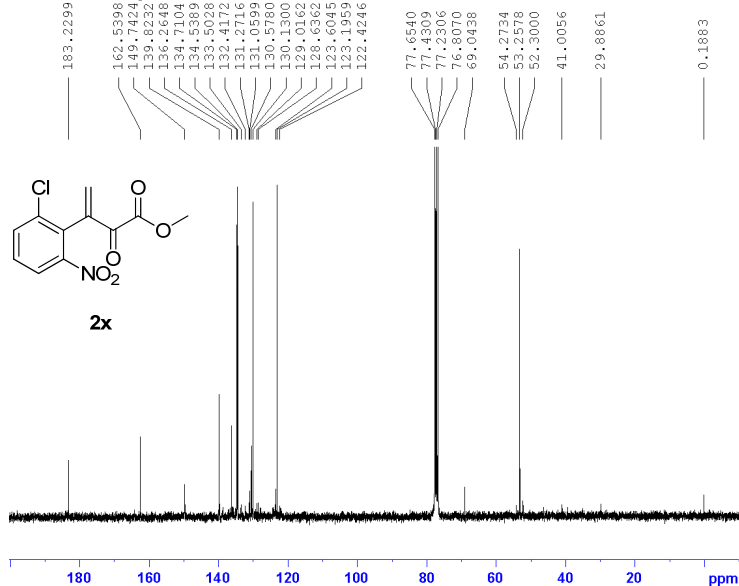

```
Current Data Parameters
NAME      2020-10
EXPNO    84
PROCNO    1

F2 - Acquisition Parameters
Date_     20201029
Time      13.38
INSTRUM   spect
PROBHD    5 mm Dual 13C/
PULPROG   zgpg30
TD         65536
SOLVENT   CDCl3
NS         3183
DS         4
SWH        17985.611 Hz
FIDRES    0.274439 Hz
AQ         1.8219508 sec
RG         14596.5
DM         27.800 usec
DE         6.00 usec
TE         673.2 K
D1         2.00000000 sec
d11       0.03000000 sec
DELTA     1.89999998 sec
TD0        1

===== CHANNEL f1 =====
NUC1      13C
P1        11.00 usec
PL1       -1.20 dB
SFO1      75.4752953 MHz

===== CHANNEL f2 =====
CPDPRG2   waltz16
NUC2      1H
PCPD2     100.00 usec
PL2       -1.00 dB
PL12      19.45 dB
PL13      23.40 dB
SFO2      300.1312005 MHz
```

<sup>13</sup>C NMR spectrum (75 MHz, CDCl<sub>3</sub>) of compound 2x

CHO-431-A, ? mg, CDCl<sub>3</sub>

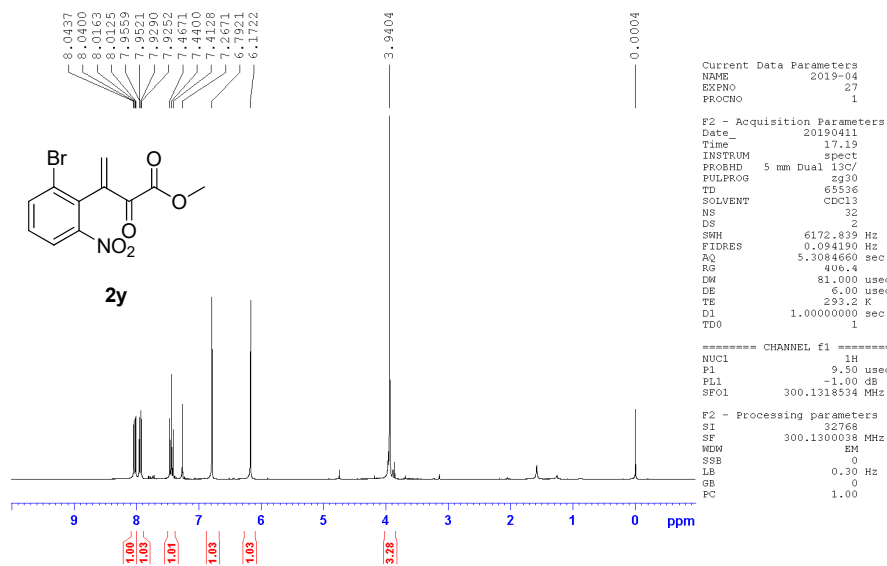

<sup>1</sup>H NMR spectrum (300 MHz, CDCl<sub>3</sub>) of compound 2y

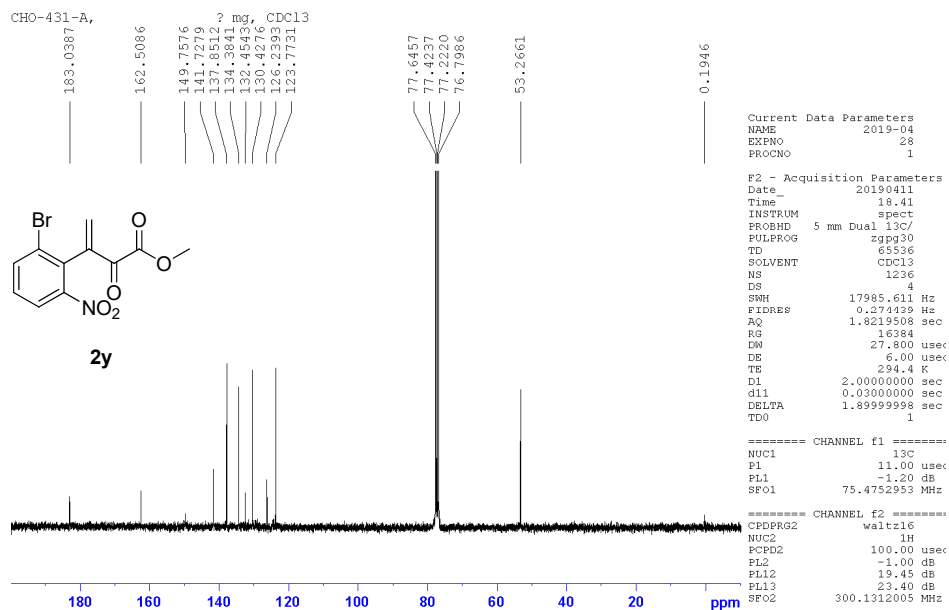

<sup>13</sup>C NMR spectrum (75 MHz, CDCl<sub>3</sub>) of compound 2y

KYE-111-A, 11.2 mg, CDCl<sub>3</sub>

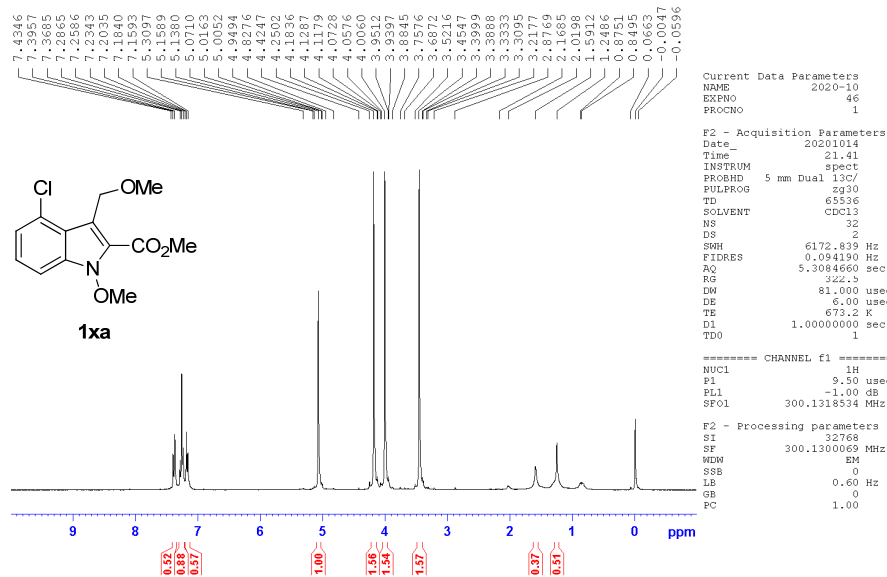

<sup>1</sup>H NMR spectrum (300 MHz, CDCl<sub>3</sub>) of compound 1xa

KYE-111-A, 11.2 mg, CDCl<sub>3</sub>

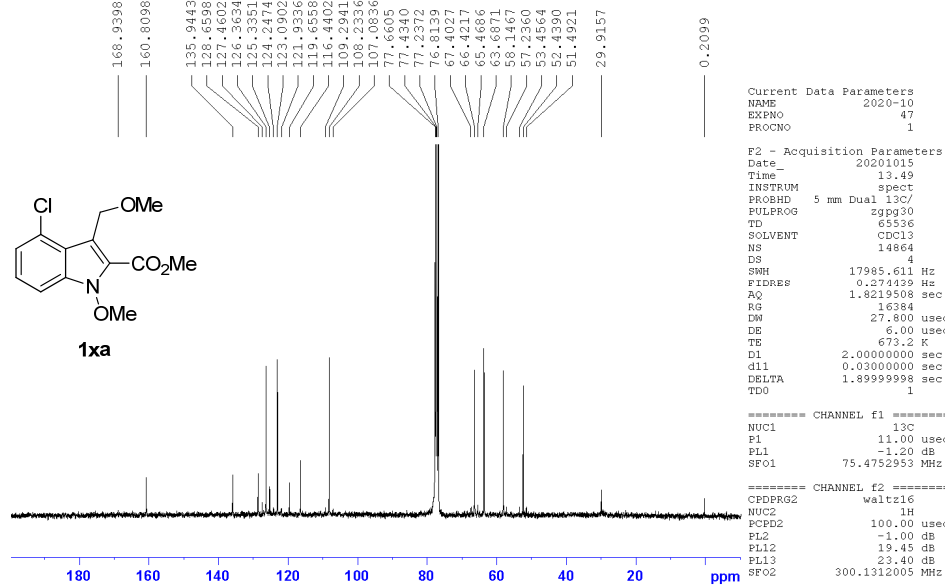

<sup>13</sup>C NMR spectrum (75 MHz, CDCl<sub>3</sub>) of compound 1xa

KYE-152-A, 15 mg, CD3Cl3

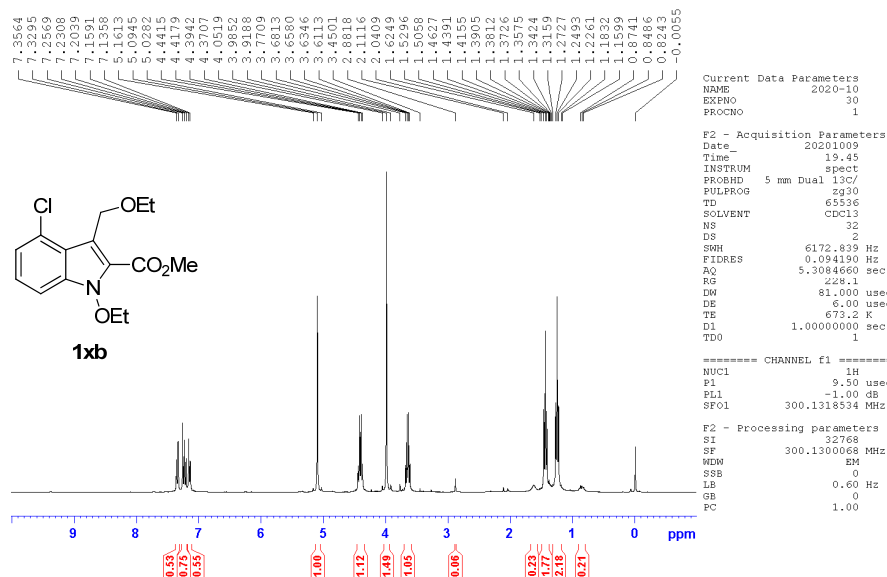

<sup>1</sup>H NMR spectrum (300 MHz, CDCl<sub>3</sub>) of compound 1xb

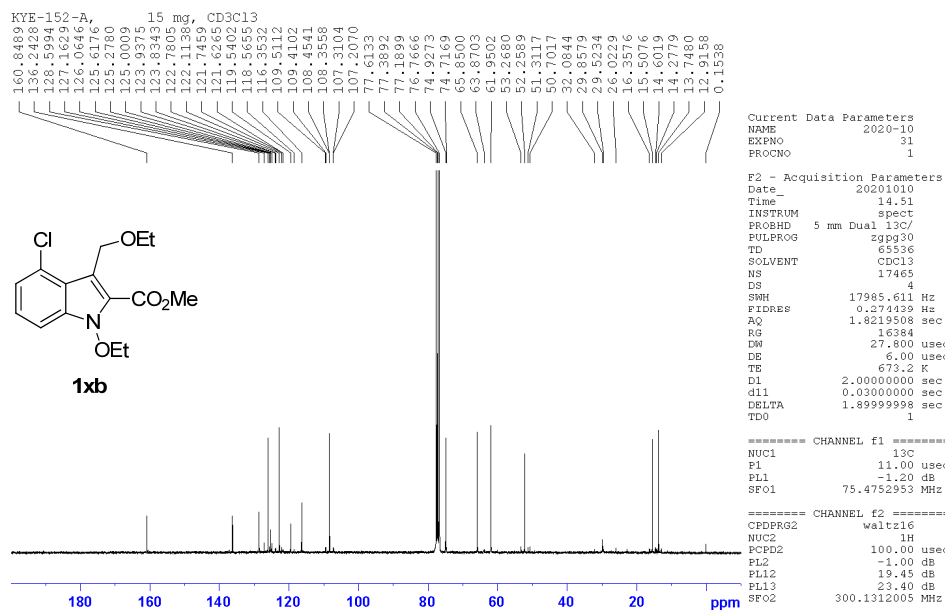

<sup>13</sup>C NMR spectrum (75 MHz, CDCl<sub>3</sub>) of compound 1xb



KYE-153-A, 7.0 mg, CDCl<sub>3</sub>

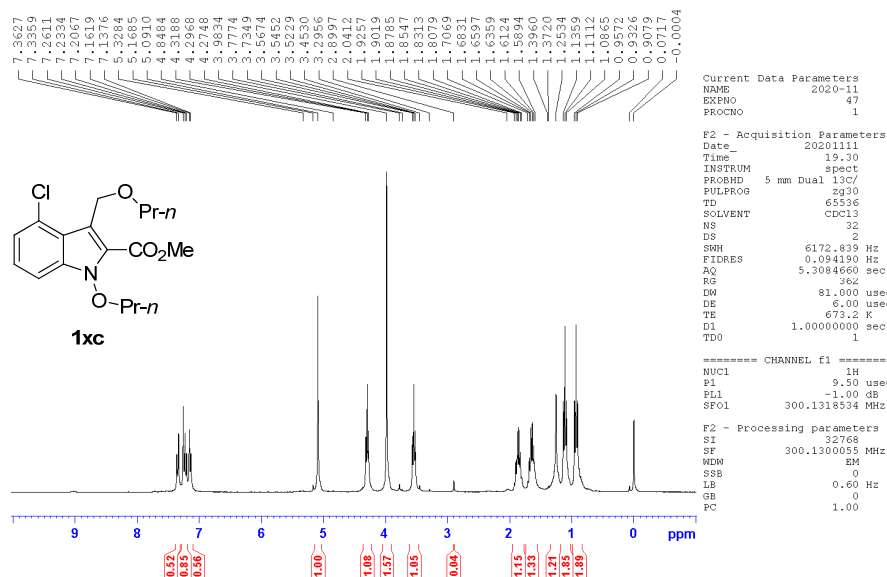

<sup>1</sup>H NMR spectrum (300 MHz, CDCl<sub>3</sub>) of compound 1xc

KYE-153-A, 7 mg, CDCl<sub>3</sub>

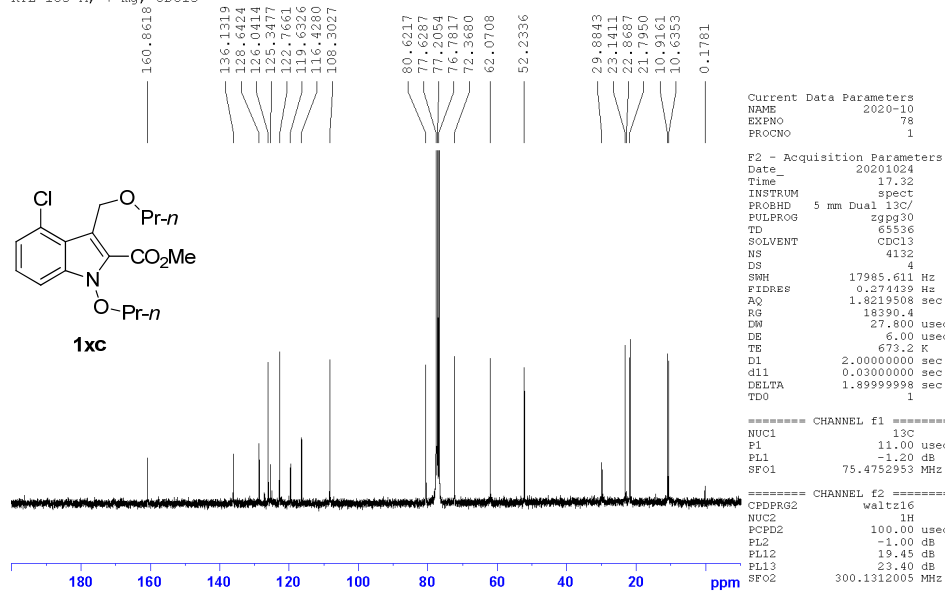

<sup>13</sup>C NMR spectrum (75 MHz, CDCl<sub>3</sub>) of compound 1xc

KYE-198-A, 10 mg, CDCl<sub>3</sub>

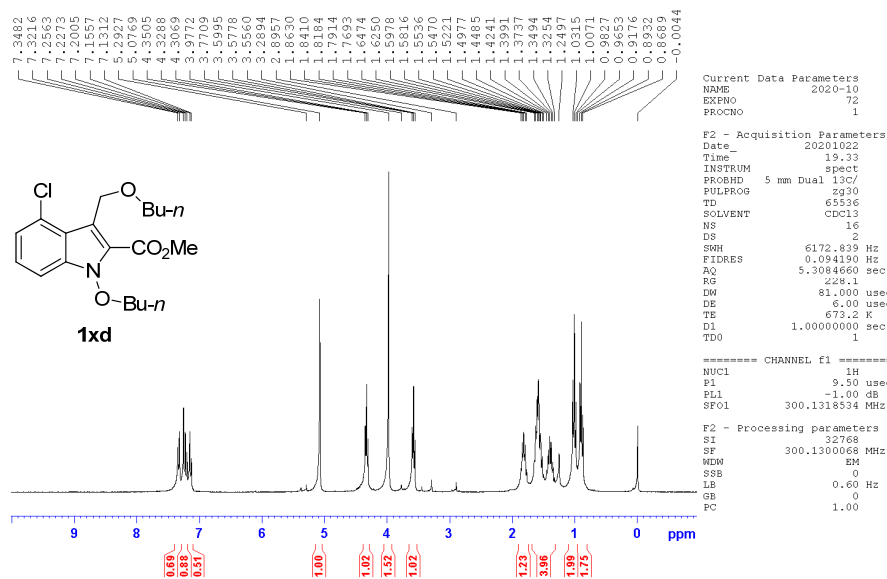

<sup>1</sup>H NMR spectrum (300 MHz, CDCl<sub>3</sub>) of compound 1xd

KYE-198-A, 10 mg, CDCl<sub>3</sub>

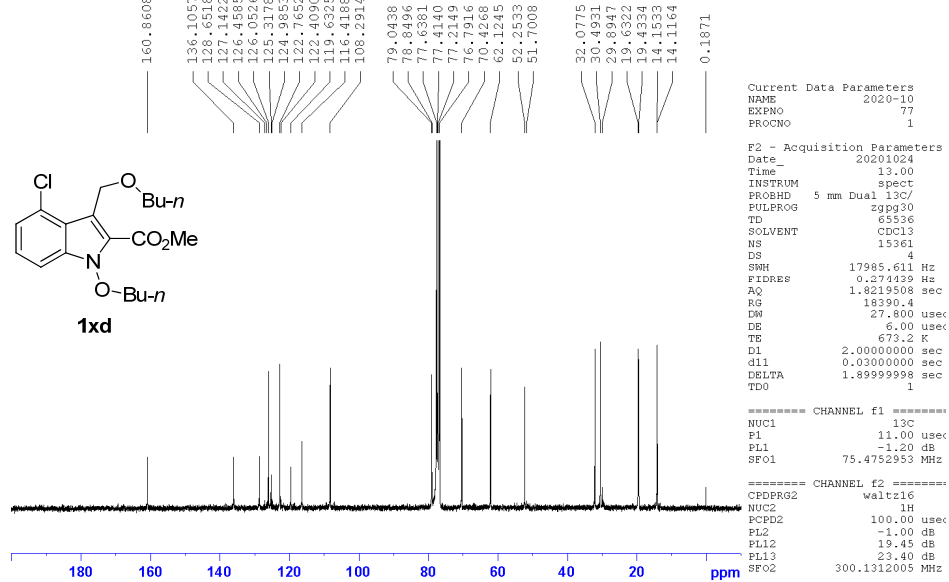

<sup>13</sup>C NMR spectrum (75 MHz, CDCl<sub>3</sub>) of compound 1xd

KYE-194-A, 10.0 mg, CDCl<sub>3</sub>

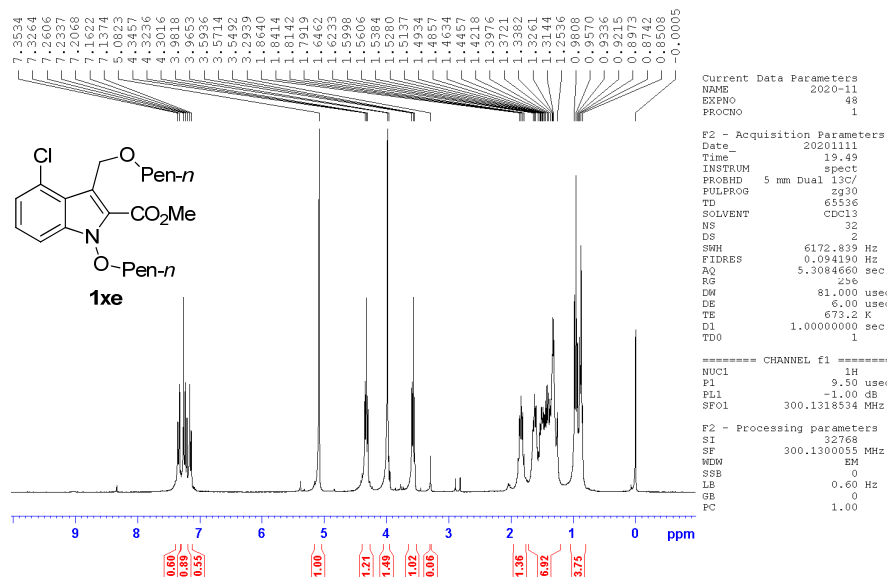

<sup>1</sup>H NMR spectrum (300 MHz, CDCl<sub>3</sub>) of compound 1xe

KYE-194-A, 10 mg, CDCl<sub>3</sub>

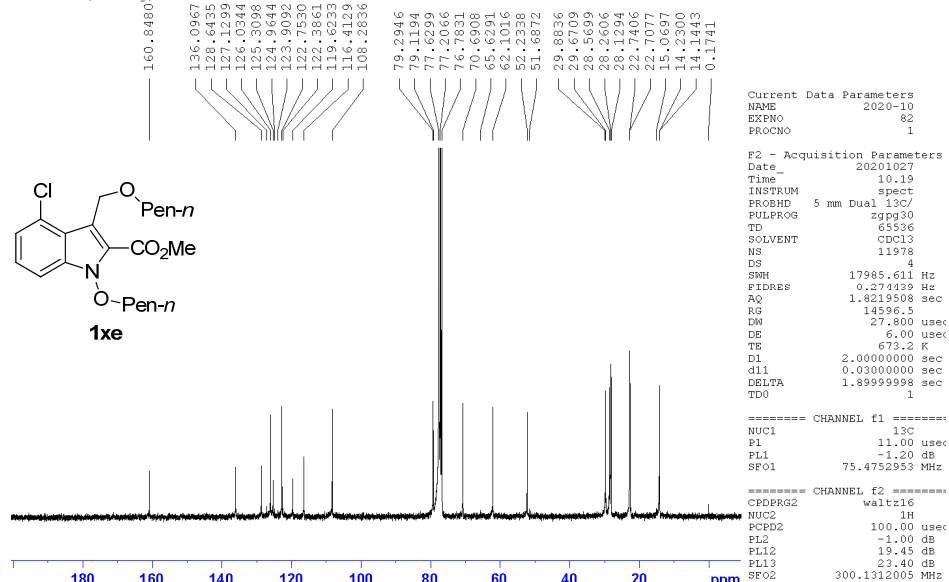

<sup>13</sup>C NMR spectrum (75 MHz, CDCl<sub>3</sub>) of compound 1xe

KYE-122-A, 12.7 mg, CDCl<sub>3</sub>

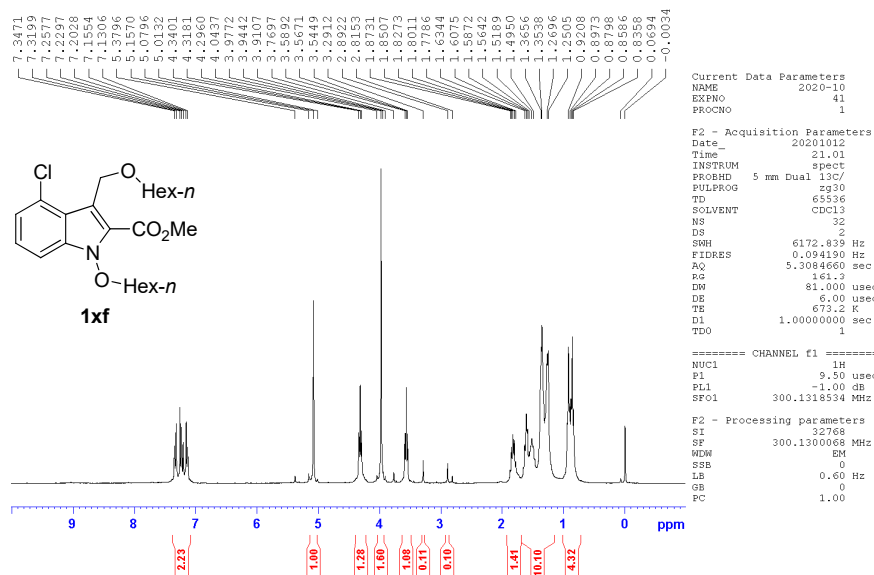

<sup>1</sup>H NMR spectrum (300 MHz, CDCl<sub>3</sub>) of compound 1xf

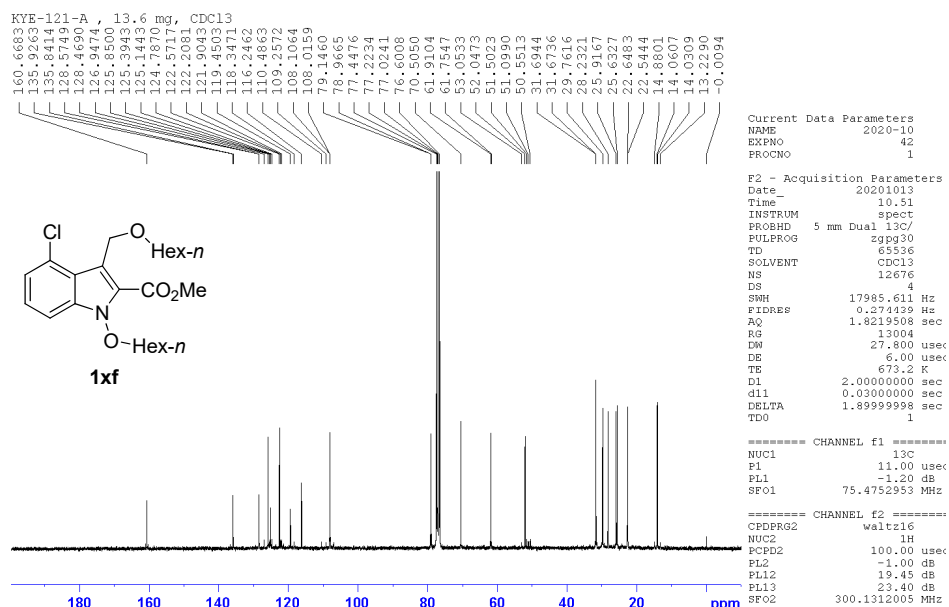

<sup>13</sup>C NMR spectrum (75 MHz, CDCl<sub>3</sub>) of compound 1xf

KYE-188-A, 23 mg, CDCl3

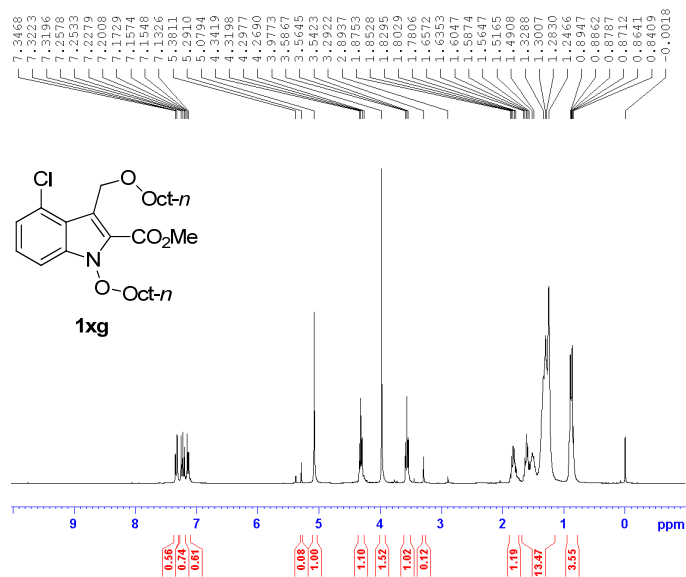

<sup>1</sup>H NMR spectrum (300 MHz, CDCl<sub>3</sub>) of compound 1xg

KYE-188-A, 23 mg, CDCl3

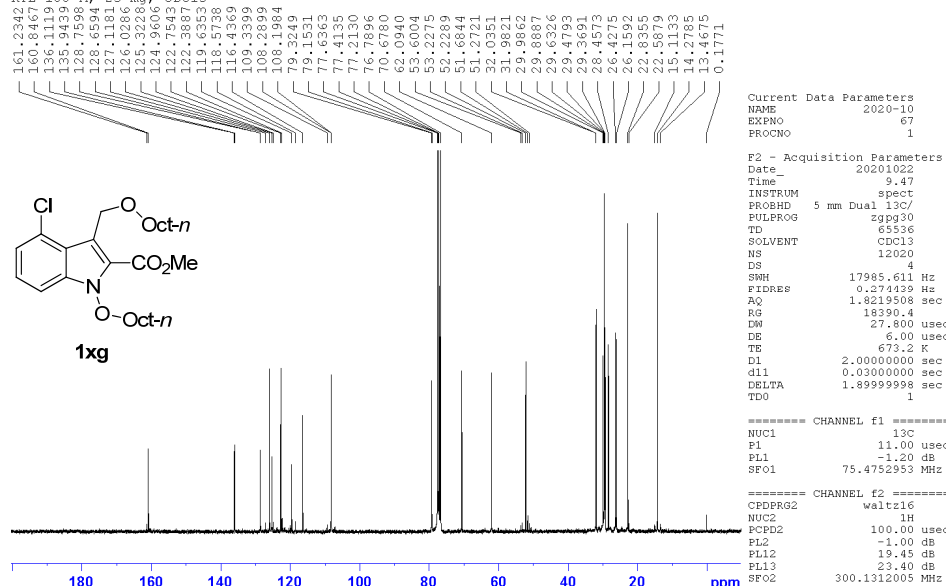

<sup>13</sup>C NMR spectrum (75 MHz, CDCl<sub>3</sub>) of compound 1xg

KYE-190-A, 12.6 mg, CDCl<sub>3</sub>

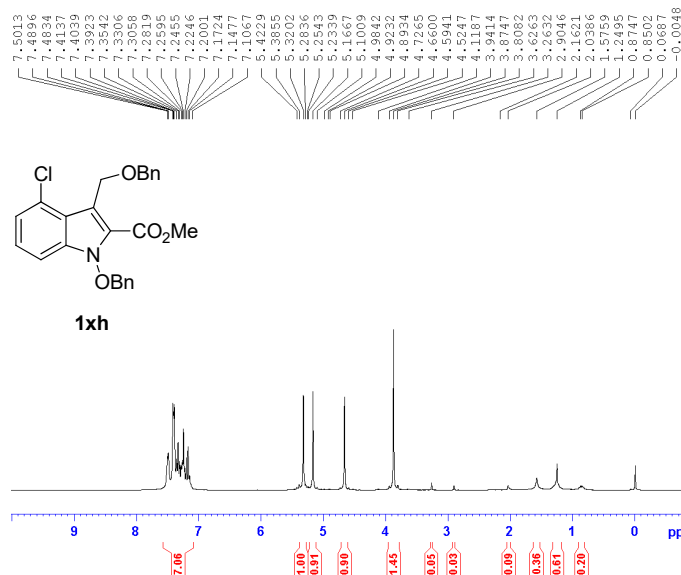

```
Current Data Parameters
NAME      2020-10
EXPNO    52
PROCNO   1

F2 - Acquisition Parameters
Date_    20201016
Time     20.04
INSTRUM spect
PROBHD   5 mm Dual 13C/
PULPROG zg30
TD       65536
SOLVENT  CDCl3
NS       32
DS       2
SWH      6172.839 Hz
FIDRES   0.094190 Hz
AQ       5.3084660 sec
RG       228.1
DW       81.000 usec
DE       6.00 usec
TE       673.2 K
D1       1.00000000 sec
TD0      1

===== CHANNEL f1 =====
NUC1     1H
P1       9.50 usec
PL1      -1.00 dB
SFO1     300.1318534 MHz

F2 - Processing parameters
SI       32768
SF       300.1300101 MHz
WDW      EM
SSB      0
LB       0.60 Hz
GB       0
PC       1.00
```

<sup>1</sup>H NMR spectrum (300 MHz, CDCl<sub>3</sub>) of compound 1xh

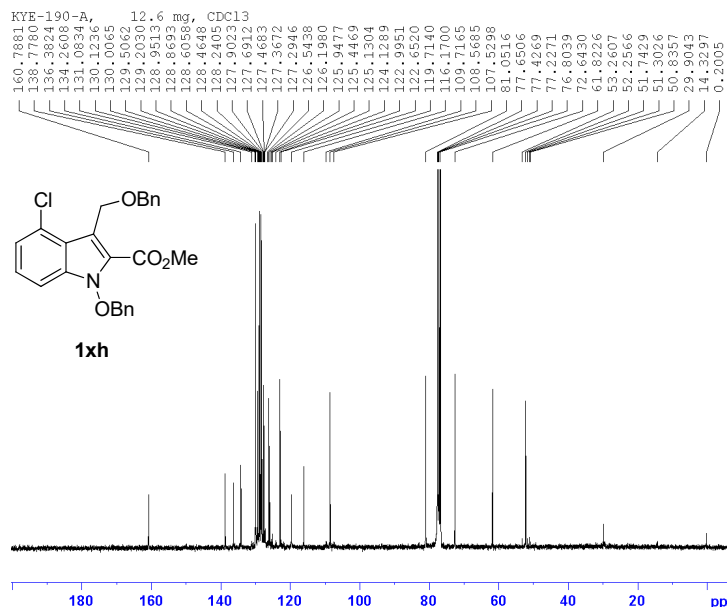

```
Current Data Parameters
NAME      2020-10
EXPNO    53
PROCNO   1

F2 - Acquisition Parameters
Date_    20201017
Time     14.36
INSTRUM spect
PROBHD   5 mm Dual 13C/
PULPROG zgpg30
TD       65536
SOLVENT  CDCl3
NS       17068
DS       4
SWH      17985.611 Hz
FIDRES   0.274439 Hz
AQ       1.8219508 sec
RG       1456.5
DW       27.800 usec
DE       6.00 usec
TE       673.2 K
D1       2.00000000 sec
d11      0.03000000 sec
DELTA    1.89999998 sec
TD0      1

===== CHANNEL f1 =====
NUC1     13C
P1       11.00 usec
PL1      -1.20 dB
SFO1     75.4752953 MHz

===== CHANNEL f2 =====
CDEPRG2 waltz16
NUC2     1H
PCPD2   100.00 usec
PL2     -1.00 dB
PL12    19.45 dB
PL13    23.40 dB
SFO2    300.1312005 MHz
```

<sup>13</sup>C NMR spectrum (75 MHz, CDCl<sub>3</sub>) of compound 1xh

KYE-121-A, 13.6 mg, CDCl<sub>3</sub>

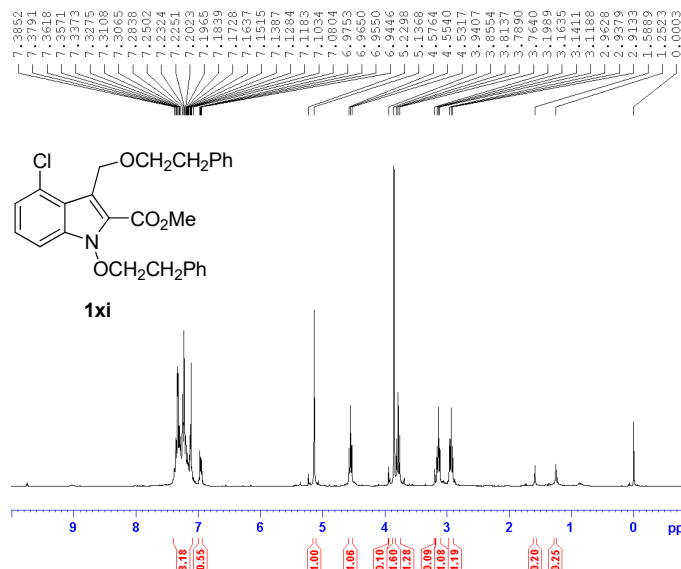

```
Current Data Parameters
NAME      2020-02
EXPNO    48
PROCNO    1

F2 - Acquisition Parameters
Date_     20200221
Time      11.51
INSTRUM   spect
PROBHD    5 mm Dual 13C/
PULPROG   zg30
TD         65536
SOLVENT   cdcl3
NS         32
DS         2
SWH        6172.839 Hz
FIDRES     0.094190 Hz
AQ         5.3084660 sec
RG         256
DW         81.000 usec
DE         6.00 usec
TE         290.5 K
D1         1.00000000 sec
TD0        1

===== CHANNEL f1 =====
NUC1       1H
P1         9.50 usec
PL1        -1.00 dB
SFO1       300.1318534 MHz

F2 - Processing Parameters
SI         32768
SF         300.1300090 MHz
WDW        EM
SSB        0
LB         0.60 Hz
GB         0
PC         1.00
```

<sup>1</sup>H NMR spectrum (300 MHz, CDCl<sub>3</sub>) of compound 1xi

KYE-121-A, 13.6 mg, CDCl<sub>3</sub>

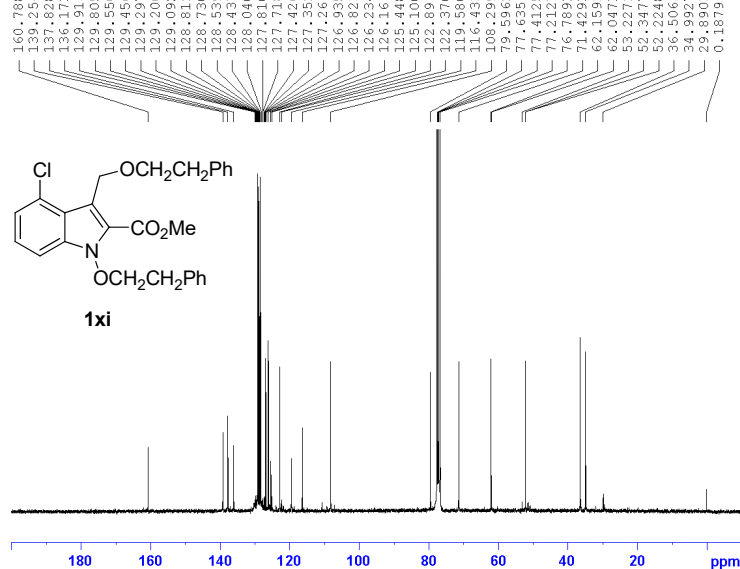

```
Current Data Parameters
NAME      2020-10
EXPNO    37
PROCNO    1

F2 - Acquisition Parameters
Date_     20201012
Time      10.01
INSTRUM   spect
PROBHD    5 mm Dual 13C/
PULPROG   zgpg30
TD         65536
SOLVENT   CDCl3
NS         35494
DS         4
SWH        17985.611 Hz
FIDRES     0.274439 Hz
AQ         1.8219508 sec
RG         16384
DW         27.800 usec
DE         6.00 usec
TE         673.2 K
D1         2.00000000 sec
d11        0.03000000 sec
DELTA     1.89999998 sec
TD0        1

===== CHANNEL f1 =====
NUC1       13C
P1         11.00 usec
PL1        -1.20 dB
SFO1       75.4752953 MHz

===== CHANNEL f2 =====
CDEPRG2   waltz16
NUC2       1H
PCPD2     100.00 usec
PL2        -1.00 dB
PL12       19.45 dB
PL13       23.40 dB
SFO2       300.1312005 MHz
```

<sup>13</sup>C NMR spectrum (75 MHz, CDCl<sub>3</sub>) of compound 1xi

KYE-187-A, 5.0 mg, CDCl<sub>3</sub>

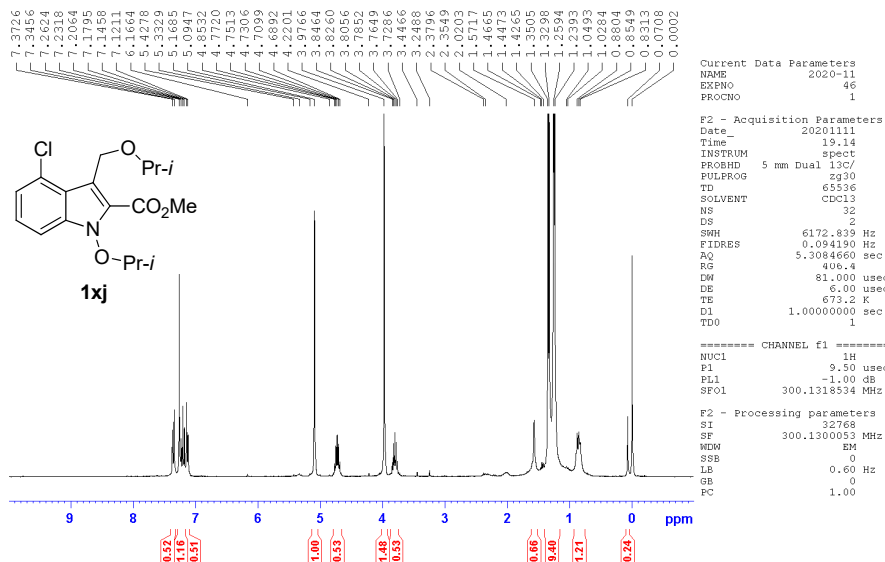

<sup>1</sup>H NMR spectrum (300 MHz, CDCl<sub>3</sub>) of compound 1xj

KYE-187-A, 5.0 mg, CDCl<sub>3</sub>

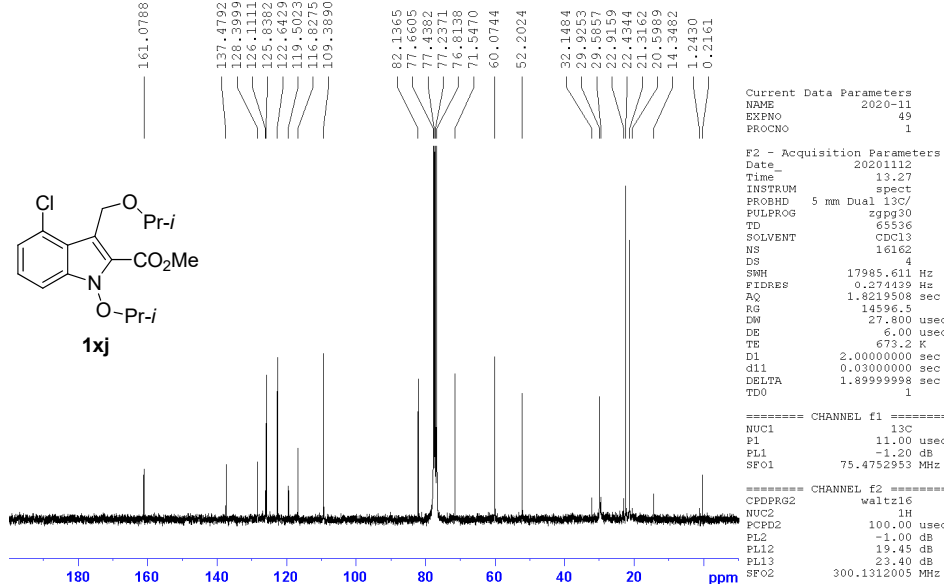

<sup>13</sup>C NMR spectrum (75 MHz, CDCl<sub>3</sub>) of compound 1xj



KYE-205-A, 3.0 mg, CDCl<sub>3</sub>

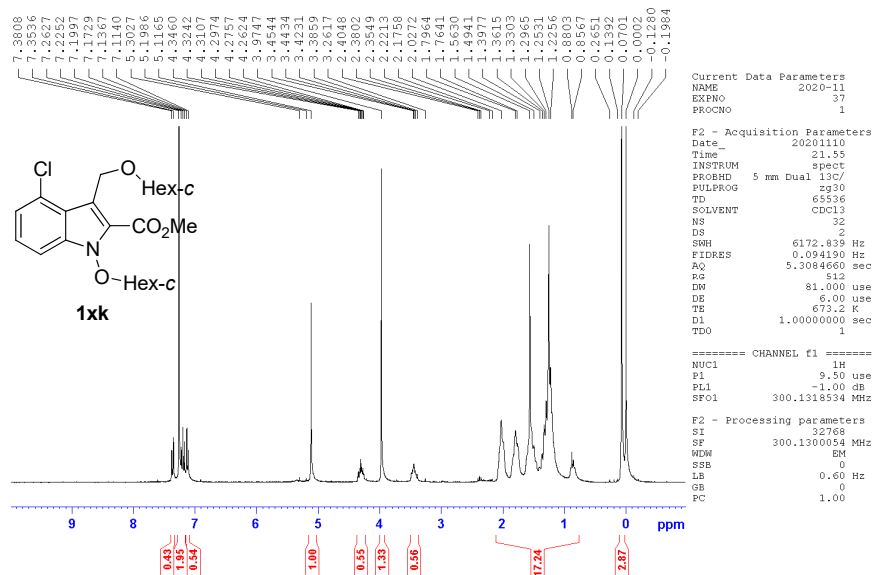

<sup>1</sup>H NMR spectrum (300 MHz, CDCl<sub>3</sub>) of compound 1xk

KYE-205-A, 3.0 mg, CDCl<sub>3</sub>

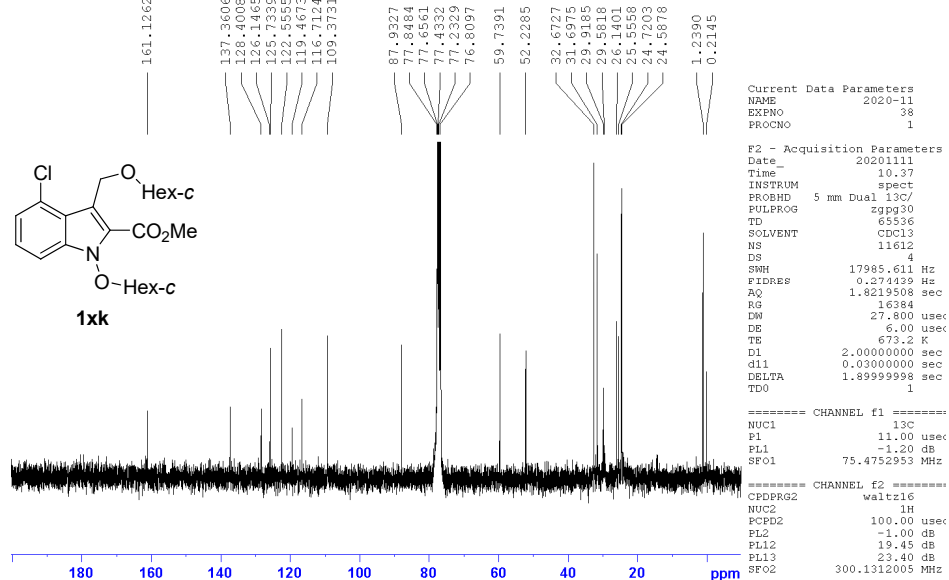

<sup>13</sup>C NMR spectrum (75 MHz, CDCl<sub>3</sub>) of compound 1xk

CHO-410-A, 6.1 mg, CDCl<sub>3</sub>

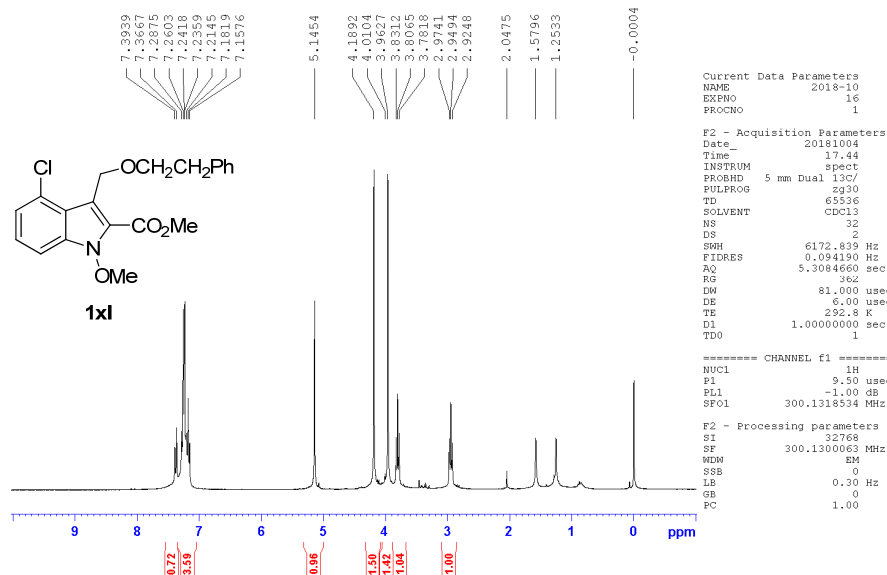

<sup>1</sup>H NMR spectrum (300 MHz, CDCl<sub>3</sub>) of compound 1xl

CHO-410-A, 6.1 mg, CDCl<sub>3</sub>

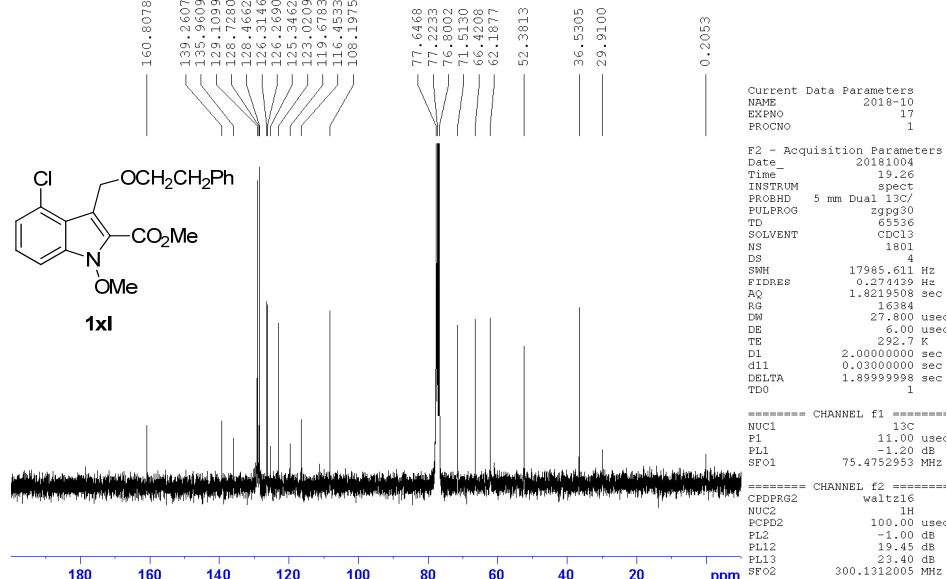

<sup>13</sup>C NMR spectrum (75 MHz, CDCl<sub>3</sub>) of compound 1xl

KYE-227-A, 13 mg, CDCl<sub>3</sub>

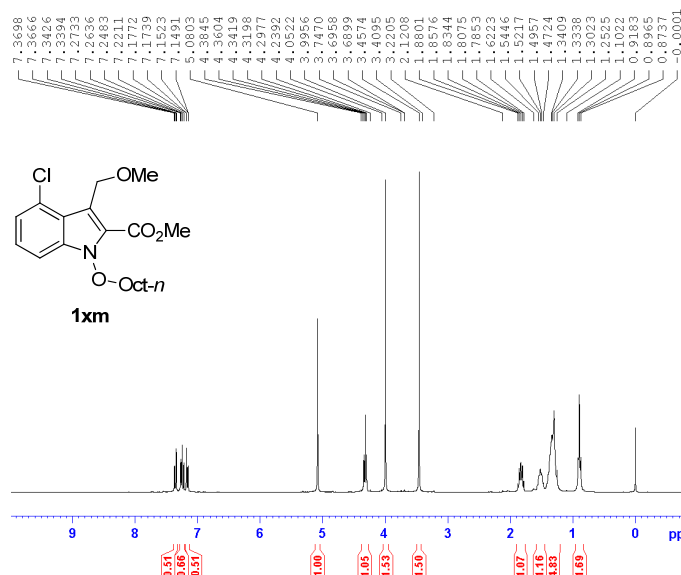

```

Current Data Parameters
NAME      2021-1
EXPNO    118
PROCNO   1

F2 - Acquisition Parameters
Date_    20210130
Time     18.28
INSTRUM spect
PROBHD   5 mm Dual 13C/
PULPROG zg30
TD       65536
SOLVENT  CDCl3
NS       16
DS       2
SWH      6172.839 Hz
FIDRES   0.094190 Hz
AQ       5.3084660 sec
RG       403.2
DM       81.000 usec
DE       6.00 usec
TE       673.2 K
D1       1.00000000 sec
TD0      1

===== CHANNEL f1 =====
NUC1     1H
P1       9.50 usec
PL1      -1.00 dB
SFO1     300.1318534 MHz

F2 - Processing parameters
SI       32768
SF       300.1300048 MHz
WDW      EM
SSB      0
LB       0.60 Hz
GB       0
PC       1.00
  
```

<sup>1</sup>H NMR spectrum (300 MHz, CDCl<sub>3</sub>) of compound 1xm

KYE-227-A, 13 mg, CDCl<sub>3</sub>

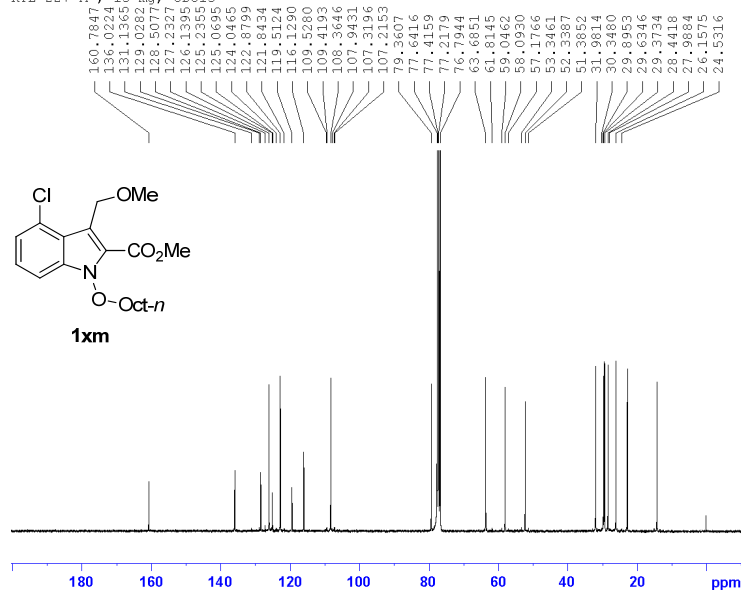

```

Current Data Parameters
NAME      2021-1
EXPNO    112
PROCNO   1

F2 - Acquisition Parameters
Date_    20210201
Time     10.36
INSTRUM spect
PROBHD   5 mm Dual 13C/
PULPROG zgpg30
TD       65536
SOLVENT  CDCl3
NS       37080
DS       4
SWH      17985.611 Hz
FIDRES   0.274439 Hz
AQ       1.8219508 sec
RG       16384
DM       27.800 usec
DE       6.00 usec
TE       673.2 K
D1       2.00000000 sec
d11      0.03000000 sec
DELTA    1.89999998 sec
TD0      1

===== CHANNEL f1 =====
NUC1     13C
P1       11.00 usec
PL1      -1.20 dB
SFO1     75.4752953 MHz

===== CHANNEL f2 =====
CDEBERG2 waltz16
NUC2     1H
PCPD2    100.00 usec
PL2      -1.00 dB
PL12     19.45 dB
PL13     23.40 dB
SFO2     300.1312005 MHz
  
```

<sup>13</sup>C NMR spectrum (75 MHz, CDCl<sub>3</sub>) of compound 1xm

KYE-228-A, 15 mg, CDCl<sub>3</sub>

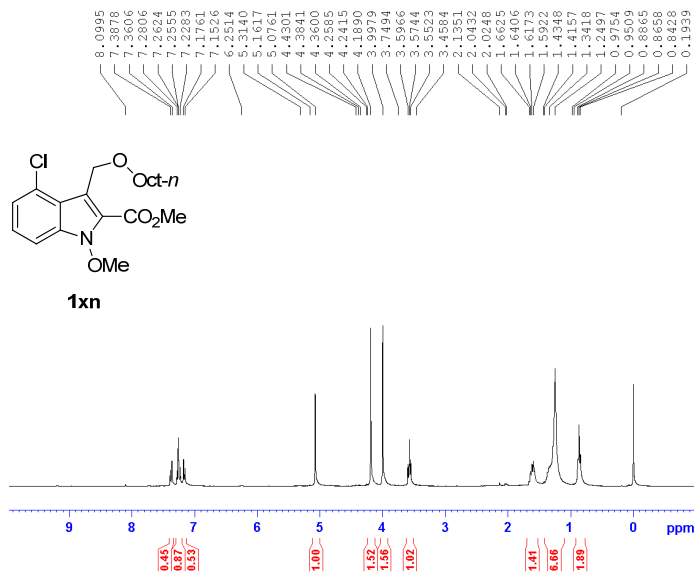

```
Current Data Parameters
NAME      2021-2
EXPNO    6
PROCNO   1

F2 - Acquisition Parameters
Date_    20210201
Time     18.40
INSTRUM spect
PROBHD   5 mm Dual 13C/
PULPROG zg30
TD       65536
SOLVENT  CDCl3
NS       32
DS       2
SWH      6172.839 Hz
FIDRES   0.094190 Hz
AQ       5.3084660 sec
RG       436.1
DM       81.000 usec
DE       6.00 usec
TE       673.2 K
D1       1.00000000 sec
TDO      1

===== CHANNEL f1 =====
NUC1     1H
P1       9.50 usec
PL1      -1.00 dB
SFO1    300.1318534 MHz

F2 - Processing parameters
SI       32768
SF       300.1300053 MHz
WDW      EM
SSB      0
LB       0.60 Hz
GB       0
PC       1.00
```

<sup>1</sup>H NMR spectrum (300 MHz, CDCl<sub>3</sub>) of compound 1xn

KYE-228-A, 15 mg, CDCl<sub>3</sub>

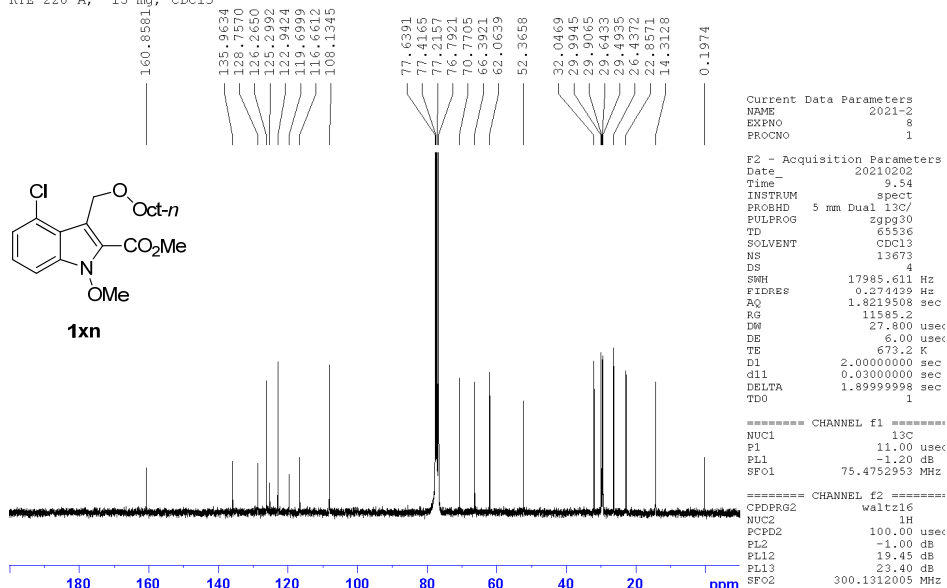

```
Current Data Parameters
NAME      2021-2
EXPNO    8
PROCNO   1

F2 - Acquisition Parameters
Date_    20210202
Time     9.54
INSTRUM spect
PROBHD   5 mm Dual 13C/
PULPROG zgpg30
TD       65536
SOLVENT  CDCl3
NS       13673
DS       4
SWH      17985.611 Hz
FIDRES   0.274439 Hz
AQ       1.8219508 sec
RG       1158.2
DM       27.800 usec
DE       6.00 usec
TE       673.2 K
D1       2.00000000 sec
d11      0.03000000 sec
DELTA    1.89999998 sec
TDO      1

===== CHANNEL f1 =====
NUC1     13C
P1       11.00 usec
PL1      -1.20 dB
SFO1    75.4752953 MHz

===== CHANNEL f2 =====
CDEPRG2 waltz16
NUC2     1H
PCPD2   100.00 usec
PL2     -1.00 dB
PL12    19.45 dB
PL13    23.40 dB
SFO2    300.1312005 MHz
```

<sup>13</sup>C NMR spectrum (75 MHz, CDCl<sub>3</sub>) of compound 1xn

CHO-449-A, 7.3 mg, CDCl<sub>3</sub>

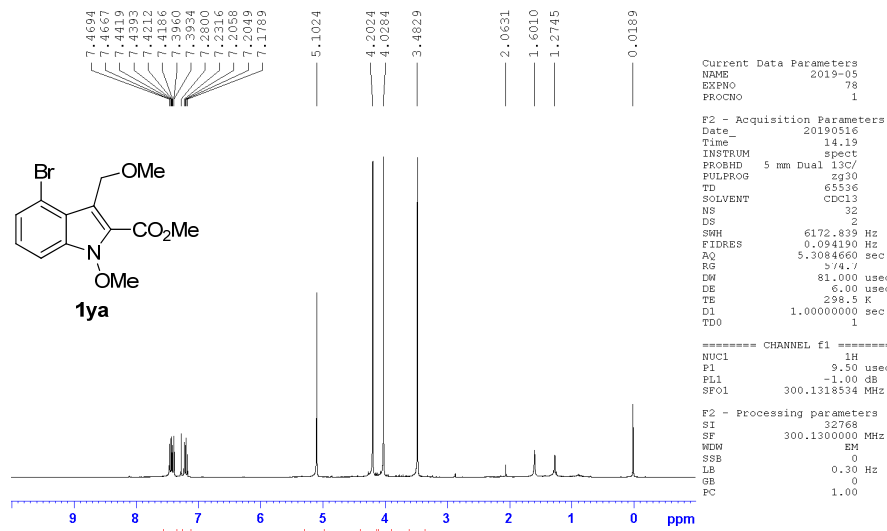

<sup>1</sup>H NMR spectrum (300 MHz, CDCl<sub>3</sub>) of compound 1ya

CHO-449-A, 7.3 mg, CDCl<sub>3</sub>

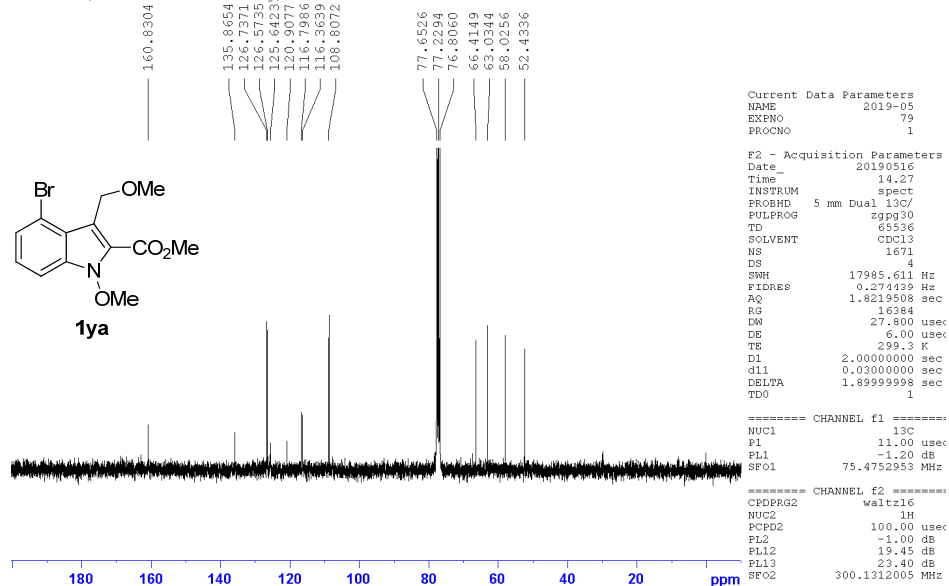

<sup>13</sup>C NMR spectrum (75 MHz, CDCl<sub>3</sub>) of compound 1ya

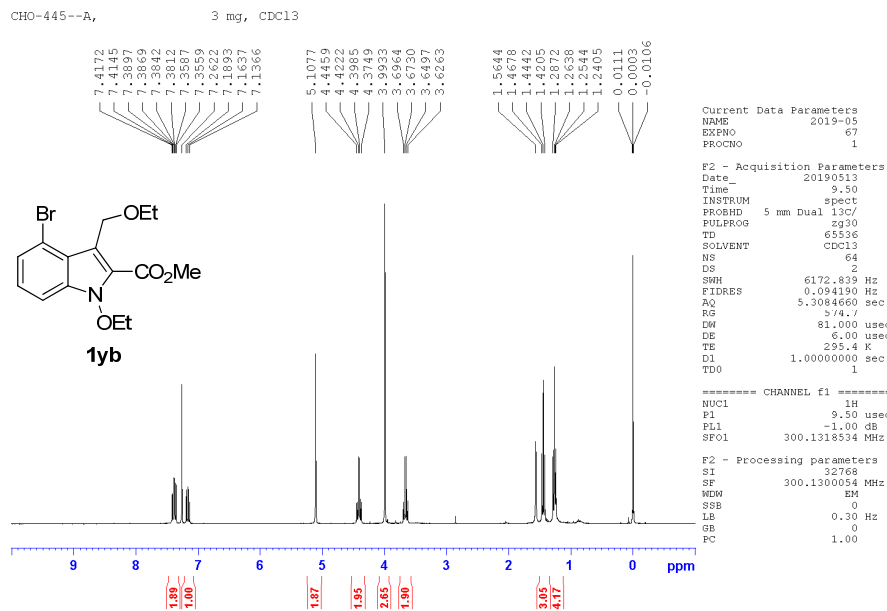

<sup>1</sup>H NMR spectrum (300 MHz, CDCl<sub>3</sub>) of compound 1yb

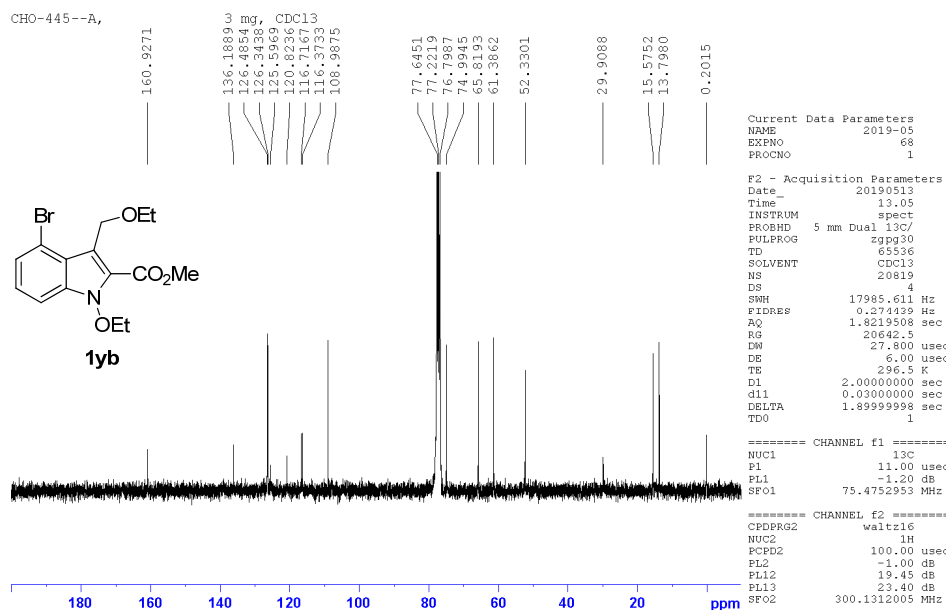

<sup>13</sup>C NMR spectrum (75 MHz, CDCl<sub>3</sub>) of compound 1yb

CHO-448-A, 10.9 mg, CDCl<sub>3</sub>

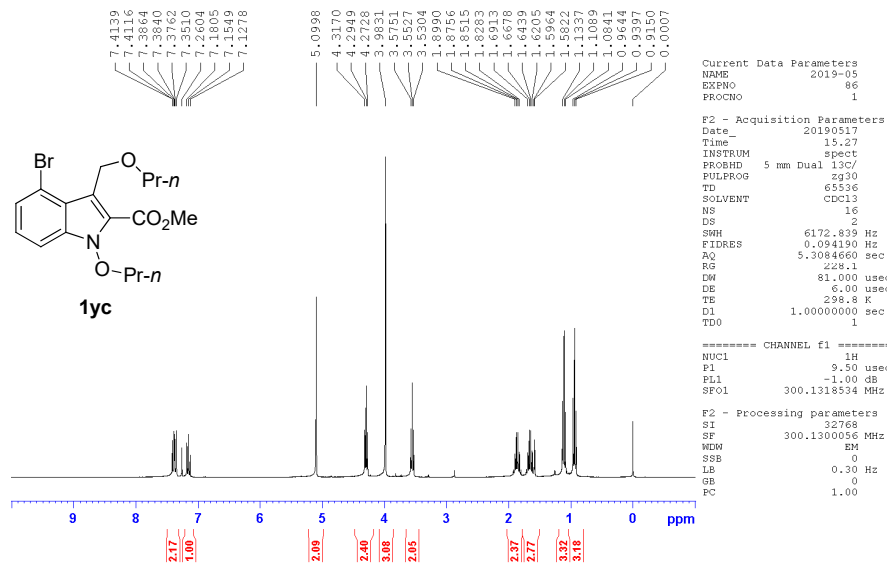

<sup>1</sup>H NMR spectrum (300 MHz, CDCl<sub>3</sub>) of compound 1yc

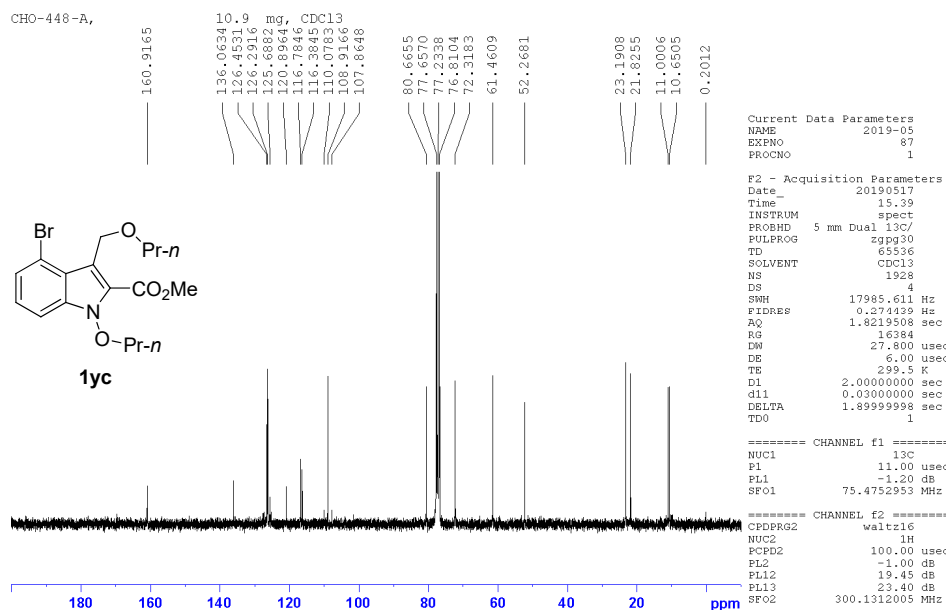

<sup>13</sup>C NMR spectrum (75 MHz, CDCl<sub>3</sub>) of compound 1yc

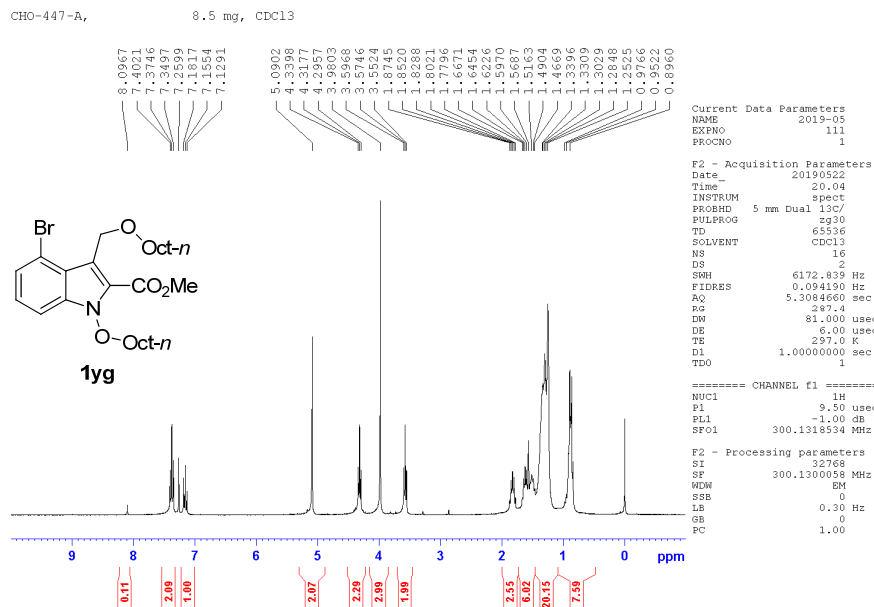

<sup>1</sup>H NMR spectrum (300 MHz, CDCl<sub>3</sub>) of compound 1yg

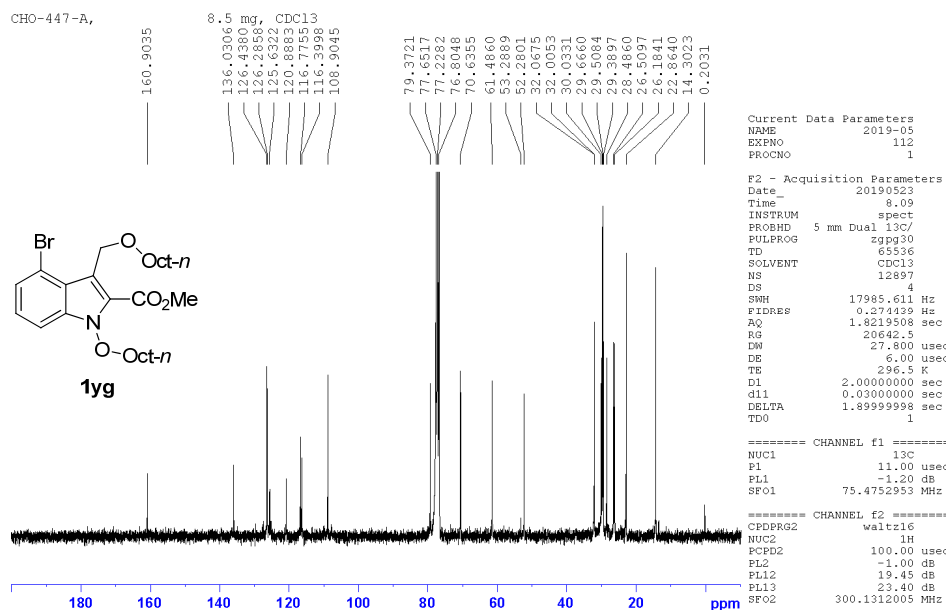

<sup>13</sup>C NMR spectrum (75 MHz, CDCl<sub>3</sub>) of compound 1yg



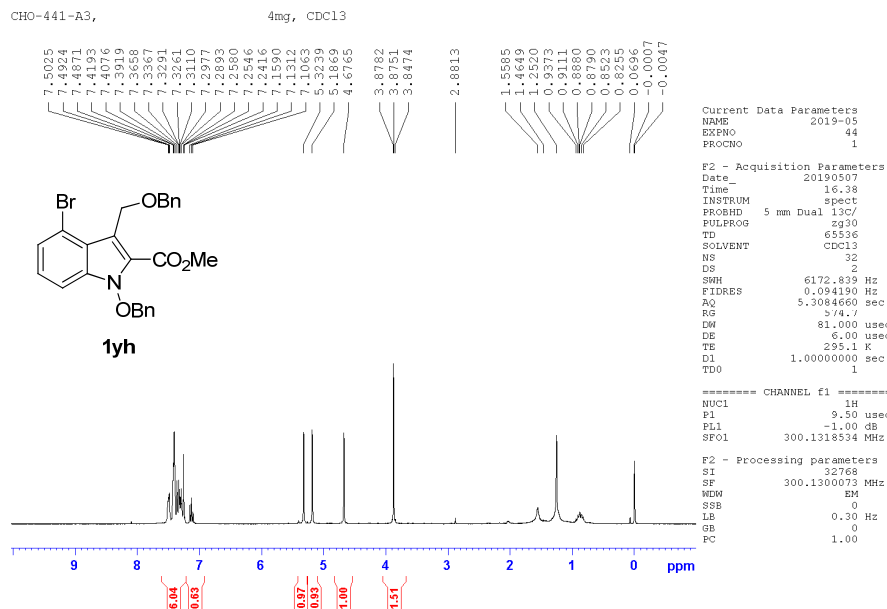

<sup>1</sup>H NMR spectrum (300 MHz, CDCl<sub>3</sub>) of compound 1yh

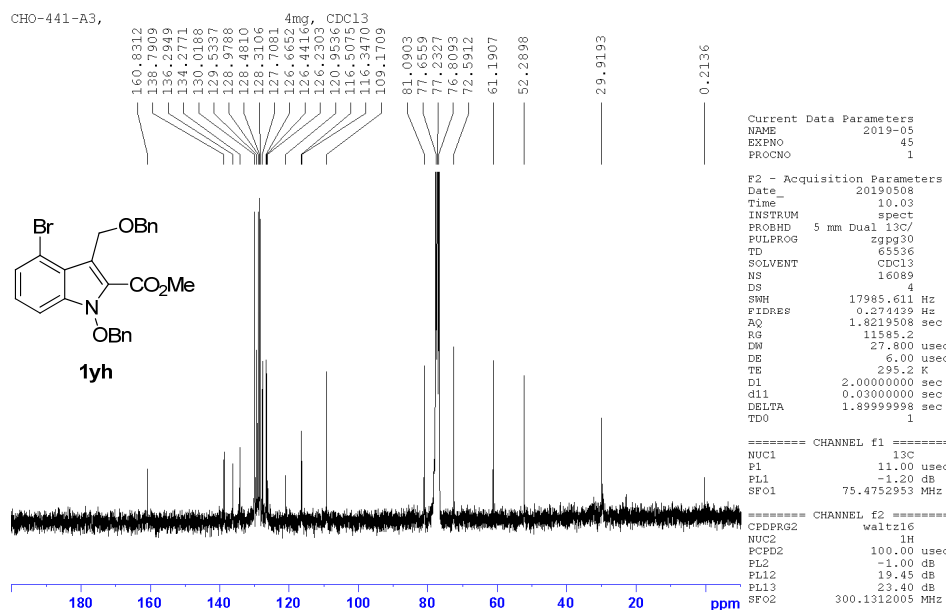

<sup>13</sup>C NMR spectrum (75 MHz, CDCl<sub>3</sub>) of compound 1yh

CHO-446--A,

6.3 mg, CDCl<sub>3</sub>

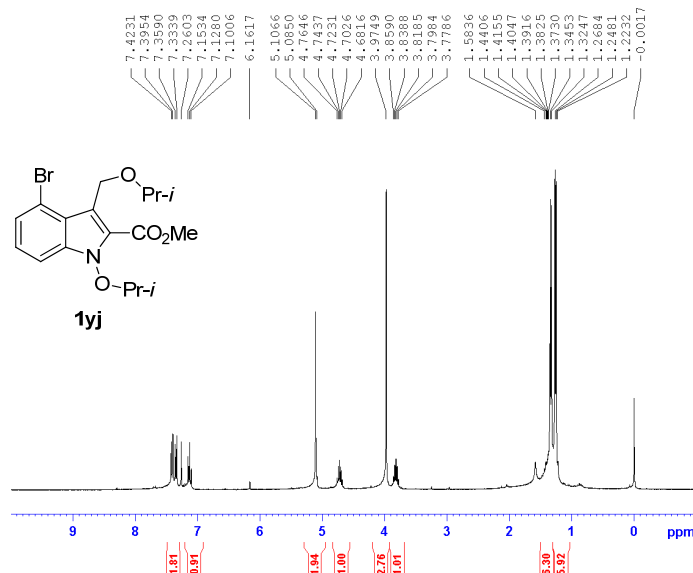

Current Data Parameters  
 NAME 2019-05  
 EXPNO 69  
 PROCNO 1

F2 - Acquisition Parameters  
 Date\_ 20190514  
 Time 8.31  
 INSTRUM spect  
 PROBHD 5 mm Dual 13C/  
 PULPROG zg30  
 TD 65536  
 SOLVENT cdcl3  
 NS 16  
 DS 2  
 SWH 6172.839 Hz  
 FIDRES 0.094190 Hz  
 AQ 5.3084660 sec  
 RG 436.1  
 DW 81.000 usec  
 DE 6.00 usec  
 TE 295.3 K  
 D1 1.0000000 sec  
 TD0 1

===== CHANNEL f1 =====  
 NUC1 1H  
 P1 9.50 usec  
 PL1 -1.00 dB  
 SFO1 300.1318534 MHz

F2 - Processing parameters  
 SI 22768  
 SF 300.1300053 MHz  
 WDM EM  
 SSB 0  
 LB 0.30 Hz  
 GB 0  
 PC 1.00

<sup>1</sup>H NMR spectrum (300 MHz, CDCl<sub>3</sub>) of compound 1yj

CHO-446--A,

6.3 mg, CDCl<sub>3</sub>

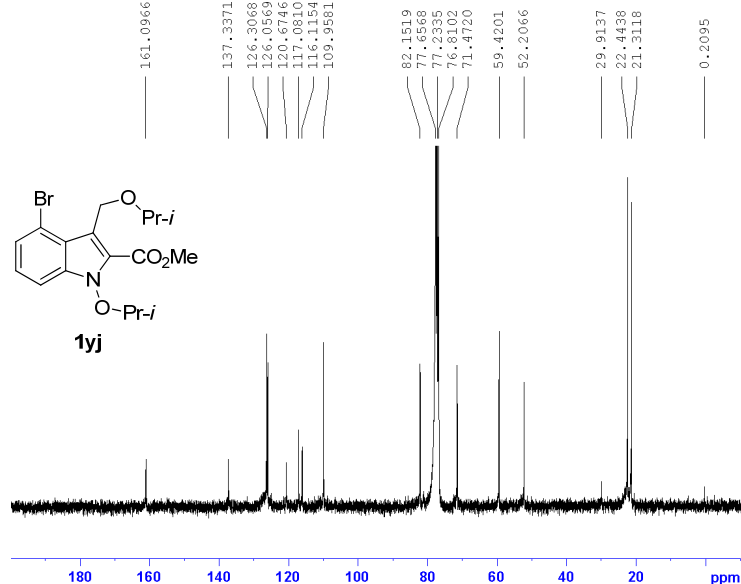

Current Data Parameters  
 NAME 2019-05  
 EXPNO 70  
 PROCNO 1

F2 - Acquisition Parameters  
 Date\_ 20190514  
 Time 12.33  
 INSTRUM spect  
 PROBHD 5 mm Dual 13C/  
 PULPROG zgpg30  
 TD 65536  
 SOLVENT CDCl3  
 NS 21665  
 DS 4  
 SWH 17985.611 Hz  
 FIDRES 0.274439 Hz  
 AQ 1.8219508 sec  
 RG 18390.4  
 DW 27.800 usec  
 DE 6.00 usec  
 TE 297.3 K  
 D1 2.0000000 sec  
 d11 0.0300000 sec  
 DELTA 1.8999998 sec  
 TD0 1

===== CHANNEL f1 =====  
 NUC1 13C  
 P1 11.00 usec  
 PL1 -1.20 dB  
 SFO1 75.4752953 MHz

===== CHANNEL f2 =====  
 CPDPRG2 waltz16  
 NUC2 1H  
 FCP02 100.00 usec  
 PL2 -1.00 dB  
 PL12 19.45 dB  
 PL13 23.40 dB  
 SFO2 300.1312005 MHz

<sup>13</sup>C NMR spectrum (75 MHz, CDCl<sub>3</sub>) of compound 1yj

KYE-206-A, 5.0 mg, CDCl<sub>3</sub>

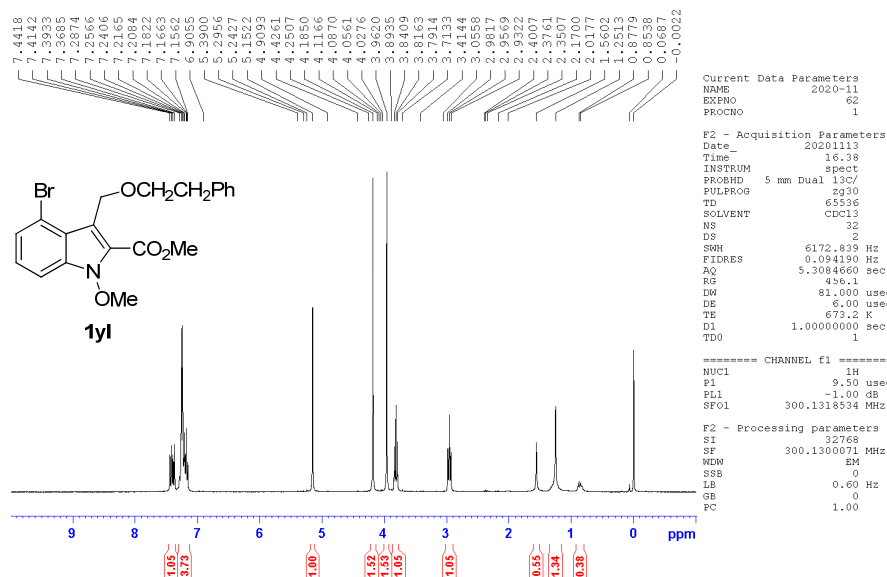

<sup>1</sup>H NMR spectrum (300 MHz, CDCl<sub>3</sub>) of compound 1yl

KYE-206-A, 5.0 mg, CDCl<sub>3</sub>

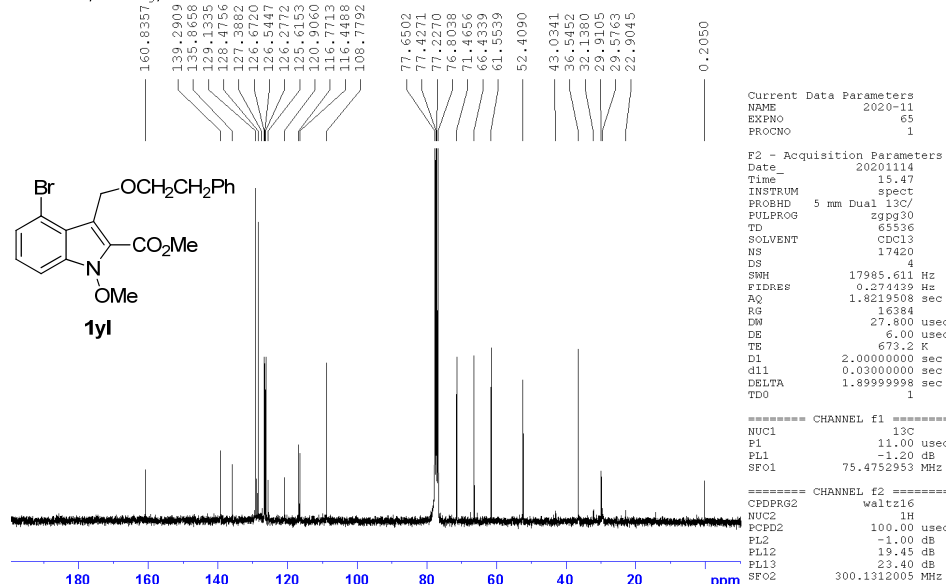

<sup>13</sup>C NMR spectrum (75 MHz, CDCl<sub>3</sub>) of compound 1yl

CHO--653-A, 8.6 mg CD3CN

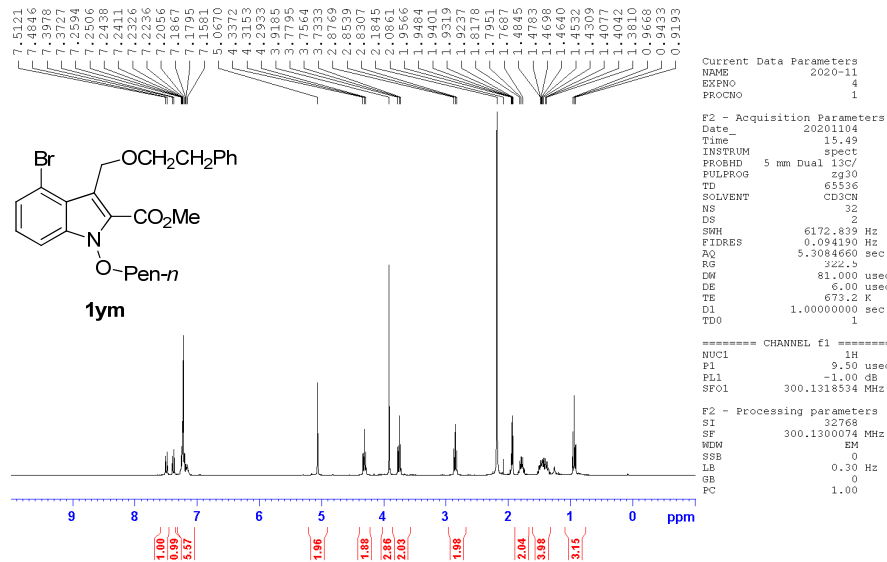

<sup>1</sup>H NMR spectrum (300 MHz, CD<sub>3</sub>CN) of compound 1ym

CHO--653-A, 8.6 mg CD3CN

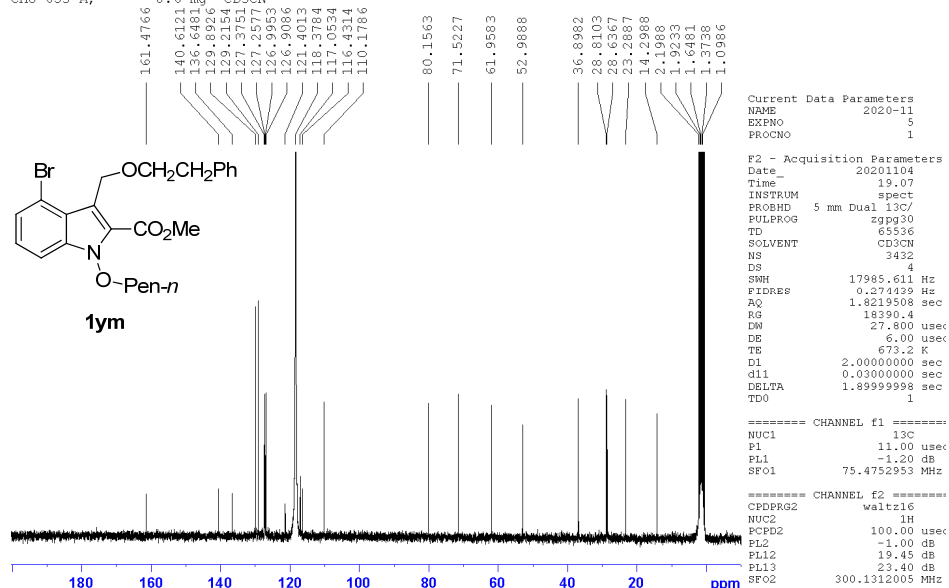

<sup>13</sup>C NMR spectrum (75 MHz, CD<sub>3</sub>CN) of compound 1ym

CHO-408-D-A 2.8mg, CDCl3

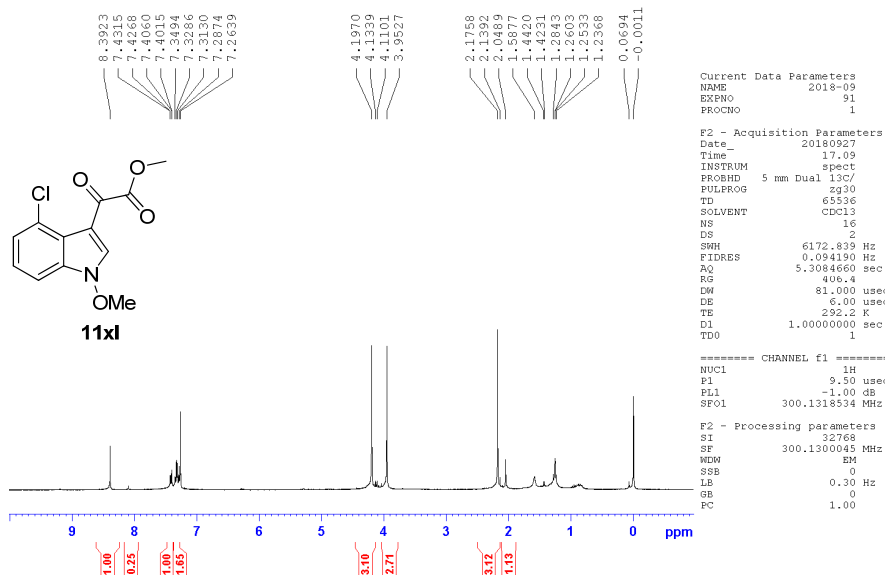

### <sup>1</sup>H NMR spectrum (300 MHz, CDCl<sub>3</sub>) of compound 11xl

CHO-408-D-A 2.8mg, CDCl3

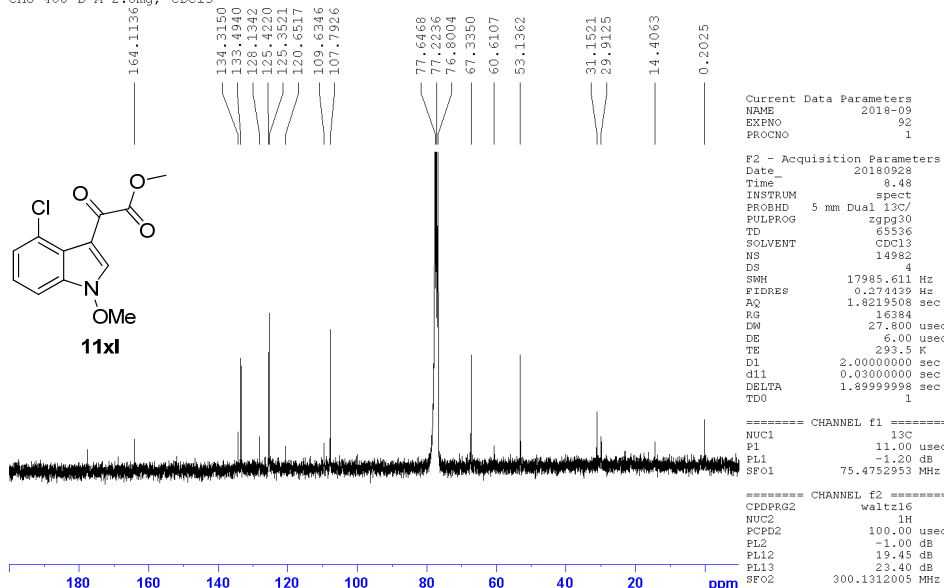

### <sup>13</sup>C NMR spectrum (75 MHz, CDCl<sub>3</sub>) of compound 11xl

KYE-227-B, 1 mg, CDCl<sub>3</sub>

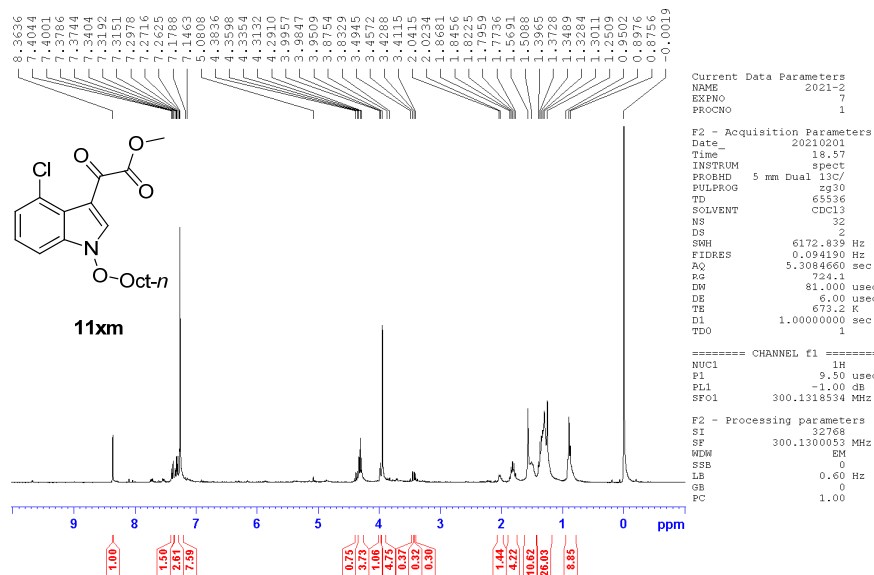

<sup>1</sup>H NMR spectrum (300 MHz, CDCl<sub>3</sub>) of compound 11xm

KYE-227-B, 1.1 mg, CDCl<sub>3</sub>

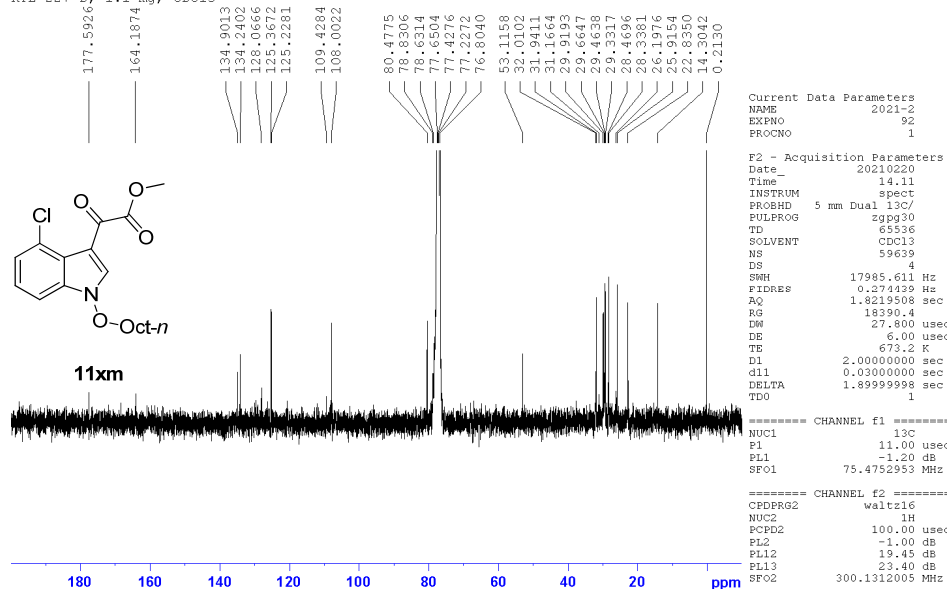

<sup>13</sup>C NMR spectrum (75 MHz, CDCl<sub>3</sub>) of compound 11xm
